1 **Title:**

2 **ERAP2 facilitates a subpeptidome of Birdshot Uveitis-associated**  
3 **HLA-A29**

4

5 W.J. Venema<sup>1,2</sup>, S. Hiddingh<sup>1,2</sup>, J.H. de Boer<sup>1</sup>, F.H.J. Claas<sup>3</sup>, A Mulder<sup>3</sup>, A.I. Den Hollander<sup>4</sup>,  
6 E. Stratikos<sup>5</sup>, S. Sarkizova<sup>6,7</sup>, G.M.C. Janssen<sup>8</sup>, P.A. van Veelen<sup>8</sup>, J.J.W. Kuiper<sup>1,2\*</sup>

7

- 8 1. Department of Ophthalmology, University Medical Center Utrecht, University of  
9 Utrecht, Utrecht, Netherlands.  
10 2. Center for Translational Immunology, University Medical Center Utrecht, University of  
11 Utrecht, Utrecht, Netherlands.  
12 3. Department of Immunology, Leiden University Medical Center, Leiden, the  
13 Netherlands  
14 4. Department of Ophthalmology, Donders Institute for Brain, Cognition and Behaviour,  
15 Department of Human Genetics, Radboud University Medical Center, Nijmegen, The  
16 Netherlands.  
17 5. National Centre for Scientific Research Demokritos, Agia Paraskevi 15341, Greece  
18 6. Department of Biomedical Informatics, Harvard Medical School, Boston, MA, USA.  
19 7. Broad Institute of MIT and Harvard, Cambridge, MA, USA.  
20 8. Center for Proteomics and Metabolomics, Leiden University Medical Center, Leiden,  
21 the Netherlands.

22

23 \* Corresponding author; email: J.J.W.Kuiper@umcutrecht.nl

24

25 **ABSTRACT (words: 199):**

26

27 Birdshot Uveitis (BU) is a blinding inflammatory eye condition that only affects  
28 HLA-A29-positive individuals. Genetic association studies linked *ERAP2* with BU, an  
29 aminopeptidase which trims peptides before their presentation by HLA class I at the cell  
30 surface, which suggests that ERAP2-dependent peptide presentation by HLA-A29 drives the  
31 pathogenesis of BU. However, it remains poorly understood whether the effects of ERAP2  
32 on the HLA-A29 peptidome are distinct from its effect on other HLA allotypes. To address  
33 this, we focused on the effects of ERAP2 on the immunopeptidome in patient-derived  
34 antigen presenting cells. Using complementary HLA-A29-based and pan-class I  
35 immunopurifications, isotope-labelled naturally processed and presented HLA-bound  
36 peptides were sequenced by mass spectrometry. We show that the effects of ERAP2 on the  
37 N-terminus of ligands of HLA-A29 are shared across endogenous HLA allotypes, but  
38 discover and replicate that one peptide motif generated in the presence of ERAP2 is  
39 specifically bound by HLA-A29. This motif can be found in the amino acid sequence of  
40 putative autoantigens. We further show evidence for internal sequence specificity for ERAP2  
41 imprinted in the immunopeptidome. These results reveal that ERAP2 can generate an  
42 HLA-A29-specific antigen repertoire, which supports that antigen presentation is a key  
43 disease pathway in BU.

44

45

## 46 Introduction

47

48 Birdshot uveitis (BU) is a rare form of uveitis characterized by distinctive inflammatory foci  
49 across the retina, hypopigmented choroidal lesions, and cystoid macular edema, which  
50 causes visual impairment when undertreated<sup>1,2</sup>. Infiltration of T cells and elevated levels of T  
51 cell cytokines in eye tissues of patients suggest that T cell-mediated inflammation is among  
52 the driving disease mechanisms<sup>3-6</sup>. This is further supported by the fact that all patients with  
53 BU carry at least one copy of the Human leukocyte antigen (HLA)-A\*29 allele, now widely  
54 considered as a prerequisite for diagnosis<sup>7,8</sup>. How HLA-A29 causes BU has remained  
55 unsolved, however, genetic association studies identified that in addition to the extreme  
56 association with the HLA-A\*29:02 allele, polymorphisms in endoplasmic reticulum  
57 aminopeptidase (ERAP)-1 and ERAP2 confer strong disease risk<sup>9,10</sup>. Within the endoplasmic  
58 reticulum, ERAP aminopeptidases destroy or trim peptides to a length that is considered to  
59 influence their binding to HLA class I and presentation at the cell surface<sup>11</sup>. Importantly, of  
60 the two major haplotypes of ERAP2, the haplotype associated with canonical full-length  
61 ERAP2 (termed Haplotype A) is associated with BU<sup>9</sup>. The other common haplotype  
62 (haplotype B) encodes a transcript that undergoes alternative splicing and  
63 nonsense-mediated RNA decay, resulting in undetectable ERAP2 protein<sup>12</sup>. Because the risk  
64 haplotypes of ERAP genes for BU have been shown to result in lower cellular expression  
65 and activity of ERAP1 in combination with high cellular expression of functional ERAP2<sup>10</sup>, it  
66 is likely that ERAP2 generates a so far unknown, but highly HLA-A29-restricted antigen  
67 repertoire that dictates T cell- or NK cell responses. This renders antigen processing and  
68 presentation a key disease pathway in BU<sup>9</sup>.

69

70 ERAPs trim the N-terminal residues of peptide substrates by loading the entire substrate  
71 inside the enzyme's cavity where the sum of interactions of amino acid side chains are  
72 considered to determine the rate and outcome of peptide proteolysis<sup>13,14</sup>. Both ERAP1 and  
73 ERAP2 have been shown to have preferences for the internal sequence of the peptide,  
74 although these preferences are broad and no specific motif has been identified<sup>13-16</sup>. These  
75 and other observations<sup>17</sup> support that ERAPs predominantly modulate the 'free' peptide  
76 cargo before binding to HLA, which suggests that physiologically-relevant sequence  
77 specificities for ERAP2 may be deciphered from the presented peptide repertoire.

78

79 Mass-spectrometry based peptidomic studies of model high-passage cell lines have  
80 revealed that ERAPs can influence the peptide repertoire presented by HLA-A29<sup>18,19</sup>.  
81 However, to date, no studies have been conducted that studied the interaction of the major  
82 genetic risk haplotypes for ERAP1, ERAP2, and HLA-A\*29:02 simultaneously in  
83 patient-derived tissues and compared the effects of ERAP2 on HLA-A29 to the other  
84 competing alleles expressed by the same cell. Knowing the potential effects of ERAP2  
85 across HLA class I alleles is important to be able to separate potential disease effects from  
86 canonical antigen processing in studies of the immunopeptidome and may help predict the  
87 outcome of pharmacological interference of ERAP2 activity using small molecule inhibitors<sup>20</sup>.

88

89 We generated patient-derived lymphoblastoid cells that naturally express high levels of HLA  
90 and ERAPs, in which we stably expressed an autoantigen for BU (i.e. the retinal S-antigen,  
91 which is only expressed in the retina). An advantage of using lymphoblastoid cells is that

92 they express high levels of the immunoproteasome (e.g., LMP7 subunit)<sup>21</sup>, which is also  
93 highly expressed in photoreceptors of the retina where the immunoproteasome is essential  
94 for the maintenance of normal retinal function and vision transduction<sup>22</sup>. The use of newly  
95 established low-passage patient-derived antigen presenting cell lines better preserves the  
96 genetic architecture critically involved with BU in the context of physiologically relevant  
97 antigen processing.

98

99 In this study, we compared the immunopeptidomes of ERAP2-wild-type and ERAP2-deficient  
100 cells using mass spectrometry profiling of elutions from immunopurification with a  
101 HLA-A29-binding antibody and subsequent pan-class I antibody. Using several unbiased  
102 computational analyses, we accurately dissect the immunopeptidomes of HLA-A29 and  
103 other allotypes, which revealed commonly shared effects on position (P)1 and P7 of peptides  
104 across alleles, and hitherto unknown, specific effects on P2 in the HLA-A29  
105 immunopeptidome with potential implications for the disease mechanisms of BU.

106

## 107 **Materials & Methods**

108

### 109 *Generation of patient-derived EBV-immortalized B cell lines*

110 EBV-immortalized lymphoblastoid cell lines (EBV-LCL) were generated from peripheral blood  
111 mononuclear cells (PBMC) from Birdshot patients, from which we selected a cell-line from a  
112 female patient (80 years old during sampling) homozygous for the risk haplotypes for *ERAP1*  
113 (*Hap10/Hap10*) and *ERAP2* (*HapA/HapA*)<sup>10</sup>. B95-8 marmoset-derived EBV supernatant was  
114 a kind gift from Dr. Willemijn Janssen, Center for Translational Immunology, UMC Utrecht.  
115 Cryopreserved PBMC were thawed and the cell number was determined. In a 24-well plate,  
116 5-10<sup>6</sup> cells were plated and cultured in freshly thawed EBV supernatant overnight at 37°C,  
117 5% CO<sub>2</sub>. The next day, transformation-medium (RPMI 1640 + 10% FBS + 1µg/ml  
118 cyclosporine) was added into the wells. The EBV-infected cells were observed under the  
119 microscope to look for transformed LCLs in clusters. Patient-derived cell lines were cultured  
120 in Roswell Park Memorial Institute 1640 medium (RPMI 1640, Thermo Fisher Scientific)  
121 supplemented with 10% heat-inactivated fetal bovine serum (FBS, Biowest Riverside) and  
122 1% penicillin/streptomycin (Thermo Fisher Scientific). To obtain stable cell lines  
123 overexpressing S-antigen, EBV-LCLs were transduced with the concentrated lentiviral  
124 supernatants (see **Supplemental Info**).

125

### 126 *ERAP2 KO using CRISPR-Cas9*

127 For the generation of ERAP2 KO EBV-LCLs the Alt-R CRISPR-Cas9 system (Integrated  
128 DNA Technologies) was used and cells were electroporated with the Neon Transfection  
129 System (Thermo Fisher Scientific). First, the RNP complex was assembled by combining the  
130 crRNA CTAATGGGGAACGATTCCT with the Alt-R tracrRNA (at a ratio of 1:1) and  
131 incubated at 95°C for 5 min, cooled down at room temperature and mixed with the Alt-R S.p  
132 Cas9 Nuclease and Buffer R (Neon system). After incubating the RNP complex for 10  
133 minutes at room temperature, 8×10<sup>5</sup> EBV-LCLs were mixed with the crRNA:tracrRNA-Cas9  
134 complex and electroporated with two pulses of 1100 V and 30 ms each using the 10 µl Neon  
135 pipette tip. Electroporated cells were immediately taken up in antibiotic-free medium and  
136 cultured for minimal 7 days. This procedure was repeated for 3 times before ERAP2 protein

137 expression levels were analyzed by western blot. A total of 5 rounds was required to reduce  
138 to levels of ERAP2 expression to near undetectable levels (**Figure 1B**).

139

#### 140 *Cell Culture and HLA-Peptide Immunopurification*

141 For stable isotope labeling by amino acids in cell culture (SILAC), EBV-LCLs were cultured  
142 in customized RPMI with the same formula but lacking the two amino acids tyrosine and  
143 phenylalanine (Thermo Fisher Scientific) and with dialysed FBS (Thermo Fisher Scientific) in  
144 order to avoid unlabeled (i.e., 'light') amino acid carry-over. The medium was supplemented  
145 with L-Tyrosine-<sup>13</sup>C<sub>9</sub>, <sup>15</sup>N (Sigma Aldrich) and L-Phenylalanine-<sup>13</sup>C<sub>9</sub>, <sup>15</sup>N (Cortecnet). Wildtype  
146 EBV-LCLs were cultured with the customized medium ('heavy' labeled) and ERAP2-KO  
147 EBV-LCLs were cultured in RPMI with 10% non-dialyzed FBS ('light', without the labeled  
148 amino acids). Two independent experimental cultures were performed; Biological replicates  
149 were defined as two separate experiments starting from the CRISPR-Cas9-mediated  
150 ERAP2-KO (i.e., independent SILAC-cultures, immunopurification, elution and mass  
151 spectrometry profiling). In each experiment, cells from each condition were cultured to obtain  
152 1x10<sup>9</sup> cells in total per cell line. Cell pellets were stored at -20°C before mass spectrometry  
153 was performed. HLA class I molecules were isolated using standard immunoaffinity  
154 purification (IP) as described before<sup>23</sup> from a fixed sample volume of 2.0 ml cell pellet per  
155 condition and biological replicate. IP was done using the human monoclonal antibody (mAb)  
156 DK1G8 (IgG1)<sup>24</sup> derived from a HLA-A29-negative multiparous woman sensitized to  
157 HLA-A29 due to pregnancy, which specifically binds to 63-L-63-Q epitope in *HLA-A\*29:01*  
158 and *A\*29:02* and the very rare allele *A\*43:01*, in a single antigen bead test.  
159 (<https://www.epregistry.com.br/index/databases/database/ABC/>), and a pan-HLA class  
160 I-specific mAb W6/32. Cell pellets from light and heavy labeled cell lines (ERAP2-WT and  
161 ERAP2-KO conditions) were combined and stored at -80 °C until mass spectrometry  
162 analysis.

163

#### 164 HLA-A29-binding and W6/32 antibodies.

165 The hybridoma cell line producing HLA-A29-binding mAb DK1G8 was cultured in  
166 protein-free hybridoma medium supplemented with penicillin/streptomycin and L-glutamine  
167 in roller bottles. Cell culture supernatant was treated with Protein-A Sepharose beads to  
168 capture the mAb and eluted with glycine pH 2.5. Eluted mAb was covalently bound to  
169 Protein-A with dimethylpimelidate for use in an immunoaffinity column  
170 (HLA-A29-Protein-A, W6/32-Protein-A Sepharose at 2.5 mg/ml). The columns were stored in  
171 PBS pH 8.0 and 0.02% NaN<sub>3</sub> at 4 °C. HLA-bound peptides were extracted as described  
172 previously<sup>23</sup>.

173

#### 174 *Isolation of HLA Class I-presented Peptides*

175 The extraction of peptides associated with HLA class I molecules was performed as  
176 described elsewhere<sup>23</sup>. Briefly, pellets from a total of 2 × 10<sup>9</sup> LCLs were lysed for 2 hours at  
177 4 °C in 50 mM Tris-HCl, 150 mM NaCl, 5 mM EDTA, and 0.5% Zwittergent 3-12  
178 (N-dodecyl-N,N-dimethyl-3-ammonio-1-propanesulfonate) (pH 8.0) and the presence of  
179 Complete® protease inhibitor (Roche). The preparation was centrifuged for 10 min at 2500  
180 rpm and 4 °C and supernatant was transferred to a new tube and centrifuged for 40 min at  
181 30,000 x g and 4 °C. The supernatant was pre-cleared with a 2-ml CL4B column and  
182 subjected to the immunoaffinity column (2ml with 5 mg ml). After washing, bound HLA class

183 I-peptide complexes were eluted from the column and dissociated with 10% acetic acid.  
184 Peptides were separated from the HLA class I molecules via passage through a 10 kDa  
185 membrane (Microcon YM-10). The filtrate was freeze dried, dissolved in 50mM NH<sub>4</sub>HCO<sub>3</sub>  
186 pH 8.4 and the peptides were further purified via 'high pH reverse phase' fractionation on a  
187 C18 column (Oasis HLB, Waters, Milford, MA). The peptides were eluted from the C18  
188 Oasis column with successively 400 µl 10/90/0.1, 20/80/0.1 and 50/50/0.1 water/acetonitrile  
189 (ACN)/formic acid (FA), v/v/v.

190

#### 191 *MS analysis*

192 Peptides were lyophilized, dissolved in 95/3/0.1 v/v/v water/acetonitrile/formic acid and  
193 subsequently analysed by on-line C18 nanoHPLC MS/MS with a system consisting of an  
194 Easy nLC 1200 gradient HPLC system (Thermo, Bremen, Germany), and a LUMOS mass  
195 spectrometer (Thermo). Fractions were injected onto a homemade precolumn (100 µm × 15  
196 mm; Reprosil-Pur C18-AQ 3 µm, Dr. Maisch, Ammerbuch, Germany) and eluted via a  
197 homemade analytical nano-HPLC column (30 cm × 50 µm; Reprosil-Pur C18-AQ 3 µm). The  
198 gradient was run from 2% to 36% solvent B (20/80/0.1 water/acetonitrile/formic acid (FA) v/v)  
199 in 120 min. The nano-HPLC column was drawn to a tip of ~5 µm and acted as the  
200 electrospray needle of the MS source. The LUMOS mass spectrometer was operated in  
201 data-dependent MS/MS mode for a cycle time of 3 seconds, with a HCD collision energy at  
202 32 V and recording of the MS<sub>2</sub> spectrum in the orbitrap. In the master scan (MS<sub>1</sub>) the  
203 resolution was 60,000, the scan range 300-1400, at the standard AGC target @maximum fill  
204 time of 50 ms. Dynamic exclusion was after n=1 with an exclusion duration of 20s. Charge  
205 states 1-3 were included. For MS<sub>2</sub> precursors were isolated with the quadrupole with an  
206 isolation width of 1.2 Da. Precursors of charge 1 were selected in the range of 800-1400,  
207 precursors of charge 2 were selected in the range 400-800, and precursors of charge 3 were  
208 selected in the range 300-600. The first mass was set to 110 Da. The MS<sub>2</sub> scan resolution  
209 was 30,000 at the standard AGC target of 50,000 @dynamic injection time.

210 In a post-analysis process, raw data were first converted to peak lists using Proteome  
211 Discoverer version 2.1 (Thermo Electron), and then submitted to the Uniprot Homo sapiens  
212 canonical database (67911 entries), using Mascot v. 2.2.07 ([www.matrixscience.com](http://www.matrixscience.com)) for  
213 protein identification. Mascot searches were with 10 ppm and 0.02 Da deviation for  
214 precursor and fragment mass, respectively, and no enzyme was specified. Methionine  
215 oxidation was set as a variable modification.

216

#### 217 *Differential expression analysis*

218 Peptide confidence False Discovery Rates (FDRs) were calculated with the Mascot  
219 Percolator<sup>25</sup> plug-in in Proteome Discoverer version 2.1 (Thermo Electron) and we used a  
220 strict target FDR of 1% (q<0.01) to obtain peptides detected with high confidence. To retrieve  
221 labeled peptides for downstream analysis, the high confidence peptides were further filtered  
222 to remove peptides with flags "InconsistentlyLabeled", "NoQuanValues", "Redundant",  
223 "IndistinguishableChannels". To detect significant changes in ligand abundance, we used the  
224 empirical Bayes workflow for mass spectrometry data based on the *limma*<sup>26</sup> and *qvalue*<sup>27</sup> R  
225 packages following Kammers and associates<sup>28</sup> (see **Supplemental Info**). The *qvalue* R  
226 package was used to provide an unbiased estimate of the false discovery rate (FDR).  
227 Changes in peptide abundance between light and heavy conditions below a moderated  
228 q<0.01 (i.e., 1% empirical FDR) was considered affected by ERAP2. After differential

229 expression analysis, peptides were assigned to HLA alleles using the *HLAthena* algorithm<sup>29</sup>,  
230 a state-of-the-art neural-network prediction algorithm trained on mass-spectrometry derived  
231 peptides from 95 mono-HLA expressing cell lines, which provides the binding score metric  
232 'MSi' for each peptide and corresponding allele (range [0,1], MSi >0.6 was considered good,  
233 MSi>0.8 was considered strong). We used the GibbsCluster 2.0 server<sup>30</sup> to deconvolute the  
234 detected 9-mers into a deconvolution solution of maximum 3 clusters (seeds=5,  $\lambda=0.7$ ,  $\sigma=5$ ,  
235  $t=3$ ). We picked a three-cluster solution that best matched the canonical binding motifs of the  
236 *HLA-A* alleles *HLA-A\*29:02* (P $\Omega$ -Tyr/Y or Phe/F) and *HLA-A\*03:01* (P $\Omega$ -Lys/K or Arg/R).

237

### 238 *Non-metric multidimensional scaling of peptides*

239 Non-metric multidimensional scaling of 9-mers using entropy-weighted (*MolecularEntropy()*)  
240 function from *HDMD* R package<sup>31</sup> peptide distances in two-dimensional space was  
241 conducted following the method of Sarkizova and associates<sup>29,32</sup>. This method uses a  
242 Hamming distance calculated with an amino acid substitution matrix (adapted from Kim *et al.*  
243 <sup>33</sup>) that is inversely weighted according to positional entropy to obtain the pairwise "distance"  
244 between 9-mers. To map the peptide distances in two dimensions, for each analysed HLA  
245 allele, non-metric multidimensional scaling (NMDS) was used with 10 separate ordinations of  
246 500 iterations using the *nmds()* function from the *ecodist* R package<sup>34</sup>. The configuration with  
247 the least stress was used for visualization of the peptidome. We next used *density-based*  
248 *spatial clustering of applications with noise* (DBSCAN)<sup>35</sup> within the *fpc* R package<sup>36</sup> to cluster  
249 peptides using the elbow method (*KNNdisplot function()* in *dbscan* R package<sup>35</sup> to estimate  
250 the number of clusters that fit the data. Sequence logo plots were generated using the  
251 *ggseqlogo* R package<sup>37</sup>. The positional amino acid usage differences were calculated by  
252 determining the count for each amino acid at indicated positions (e.g., P1, P2) in the  
253 peptides using the *MolecularEntropy()* function from the *HDMD* R package and a fisher  
254 exact test was used (*fisher.test ()* function in r base) to assess the differences at indicated  
255 positions. A chi-squared test (*chisq.test()* in r base) was used to assess for differences in the  
256 number of ERAP2 affected peptides per cluster. All *P* values were adjusted (termed *Padj*)  
257 using the bonferroni method as indicated. A *grand average of hydropathicity* (GRAVY)  
258 hydrophobicity index on the Kyte-Doolittle scale for each peptide was calculated with the  
259 *hydrophobicity()* function in *Peptides* R package<sup>38</sup>. Differences in binding scores and  
260 hydrophobicity index were assessed using the *dunnTest()* function in the *FSA* R package<sup>39</sup>.

261

### 262 *Western Blot analysis*

263 Protein levels of S-antigen, ERAP1 and ERAP2 were analysed using western blotting. Total  
264 cell lysates were prepared using the NP40 lysis buffer (1% NP40, 135 mM NaCl, 5 mM  
265 EDTA, 20 mM Tris-HCl, pH=7.4) complemented with complete protease inhibitor cocktail  
266 (Roche). Protein lysates (10  $\mu$ l/lane) were separated on a 4-20% Mini-PROTEAN TGX gel  
267 (Bio-Rad Laboratories) and transferred to a polyvinylidene difluoride membrane  
268 (Immobilon-P PVDF, Millipore). Membranes were blocked in 5% nonfat dry milk in TBST and  
269 probed overnight at 4°C with antibodies recognizing ERAP1 (AF2334, R&D Systems),  
270 ERAP2 (AF3830, R&D Systems), S-antigen ( $\alpha$ -mGFP, TA180076, Origene, to detect the  
271 fusion protein S-antigen-GFP) or  $\alpha$ -tubulin (T6199, Sigma). After washing, membranes were  
272 incubated with anti-mouse secondary antibody conjugated to horseradish peroxidase (HRP)  
273 (DAKO) or anti-goat secondary antibody conjugated to HRP (DAKO). Protein bands were  
274 detected with Amersham Prima Western Blotting (RPN22361, GE Healthcare) on the

275 ChemiDoc Gel Imaging System (Bio-Rad Laboratories). The ratio of the intensity was  
276 calculated using Image Lab 5.1 (Bio-Rad Laboratories) for each experiment.

277

#### 278 *Data availability.*

279 Analysis code and supporting data files can be found at  
280 [https://github.com/jonaskuiper/ERAP2\\_HLA-A29\\_peptidome](https://github.com/jonaskuiper/ERAP2_HLA-A29_peptidome). Mass spectrometric raw data  
281 has been deposited in the MassIVE depository (MassIVE dataset XXXXX) under the creative  
282 commons zero license (CC0 1.0).

283

## 284 **Results**

285

### 286 *Generation of a model for ERAP2-mediated antigen processing and presentation*

287 We generated lymphoblastoid cells (LCLs) from a *HLA-A\*29:02*-positive Birdshot patient  
288 homozygous for risk haplotypes of *ERAP1* (*Hap10/Hap10*) and *ERAP2* (*HapA/HapA*)(**Figure**  
289 **1A**)<sup>9,10</sup> and the retinal S-antigen was stably expressed by lentiviral transduction (see  
290 **Supplemental Notes**). Genotyping of the patient revealed *HLA-A\*29:02*, *HLA-A\*03:01*,  
291 *HLA-B\*40:01*, *HLA-B\*44:03*, *HLA-C\*16:01*, and *HLA-C\*03:04* alleles. Because the risk  
292 allotype of *ERAP1* shows relatively low aminopeptidase activity<sup>10</sup>, we focused our analysis  
293 on the effects of *ERAP2* on the immunopeptidome. We used CRISPR-Cas9  
294 ribonucleoprotein delivery with a guideRNA targeting exon 2 in *ERAP2* (**Figure 1A**) to  
295 disrupt protein expression of *ERAP2* and generate a *ERAP2*-KO LCL, while preserving the  
296 protein expression of *ERAP1* (**Figure 1B**).

297 Next, we used stable isotope labeling by amino acids in cell culture (SILAC) to incorporate  
298 “heavy” L-Tyrosine-<sup>13</sup>C<sub>9</sub>, <sup>15</sup>N (Tyr/Y) and L-Phenylalanine-<sup>13</sup>C<sub>9</sub>, <sup>15</sup>N (Phe/F) in the ‘wild type’  
299 (WT) LCLs and compare these to unlabeled (“light”) culture conditions for the *ERAP2*-KO  
300 LCL cells (**Figure 1C, 1D**). The amino acids Y/F are observed in 95% of previously identified  
301 *HLA-A29* ligands (**Figure 2A**), but are also found in the majority of peptides presented by the  
302 other *HLA* allotypes - with exception of *HLA-B40:01*.

303

### 304 *Capture of a high-quality HLA-A29 peptidome*

305 Using the *HLA-A29*-binding antibody, a total of 2315 unique peptides were identified with  
306 high confidence (Mascot Percolator  $q < 0.01$ ) between biological replicates (*Jaccard* similarity  
307 = 0.64)(**Figure 1D**) that were used for further analysis. These were predominantly 9-11 mers  
308 (88%), which fits the length distribution<sup>40</sup> of *HLA-A29* ligands (**Figure 2B**). The  
309 *HLA-A29*-binding antibody may weakly cross-react with other *HLA-A* allotypes (see  
310 **Methods**). This is of relevance given that *HLA-A\*29* alleles are low expressed *HLA-A*  
311 alleles<sup>41</sup> compared to high expressed *HLA-A\*03* alleles. We used *GibbsCluster 2.0* for  
312 unbiased clustering of the peptides, which found a deconvoluted solution that consisted of 3  
313 clusters; two motifs fitting the canonical *HLA-A29:02* binding motif (C-terminal position Y or  
314 PΩ-Y) and 1 cluster highly similar to the dominant *HLA-A03:01* motif (PΩ Lysine (K) or  
315 Arginine (R))(**Figure 2C**) and shows that the *HLA-A29* antibody cross-reacts with  
316 *HLA-A03:01*. Indeed, when we used the *HLAthena* algorithm<sup>29</sup>, ligands in cluster I and II  
317 were predominantly assigned to *HLA-A29:02* (84% and 86%, respectively), and 93% of  
318 ligands in cluster III were assigned to *HLA-A03:01* (**Figure 2D**). However, because 66% and  
319 20% of peptides in clusters I and II assigned to other endogenous *HLA* alleles also showed

320 high binding scores for HLA-A29:02 (**Figure 2E**), we later choose to filter the dataset using  
321 bindings scores for HLA-A29:02 (**Figure 2G**).

322

323 Because we were interested in determining significant changes in peptide abundance  
324 associated with ERAP2, we first jointly analyzed the relative abundance (fold change) of light  
325 (KO) over heavy (WT) labeled peptides from both experiments using *limma*<sup>28</sup>. A total of  
326 1,896 peptides (**Figure 2F**) were detected in both light and heavy channels and used for  
327 analysis. Analysis of peptides unique to one of the conditions is shown in the Supplemental  
328 Info. Note that the log fold changes of pooled normalized peptides abundances from light  
329 and heavy channels by *limma* strongly correlate (spearman  $r = 0.95$ ) with the light/heavy  
330 ratio abundance of each experiment (**Figure 2F**), thus the normalization steps preserve the  
331 data structure, while improving the power to detect significant changes<sup>28</sup>. From the 1,330 8-  
332 to 11-mers HLA-A29 epitopes ( $MSi > 0.6$  by *HLAthena*)(**Figure 2G**), 1,195/1,330 (89%) of the  
333 peptides in our HLA-A29 dataset have been reported as ligands for HLA-A29 of which 78%  
334 detected in mono-allelic or homozygous HLA-A29-expressing cell systems<sup>18,29</sup>, supporting  
335 the notion that the approach taken yields an accurate representation of the  
336 peptide-presenting properties of HLA-A29:02.

337

338 *ERAP2 shapes P1 of HLA-A29 ligands.*

339 At a false discovery rate of 1%, in ERAP2-WT compared to ERAP2-KO cells, a total of 226  
340 peptides were detected at decreased abundance in the binding groove of HLA-A29 (termed  
341 ERAP2-“sensitive” peptides), and 228 peptides were increased in abundance (termed  
342 ERAP2-“dependent” peptides) (**Figure 2H and Table S1**). We detected the 9-mer  
343 VTLTCAFRY from retinal S-antigen, which was ~6-fold higher ( $\text{Log}_2[\text{FC}] = 2.45$ ) in  
344 ERAP2-KO cells compared to ERAP2-WT cells, indicating ERAP2 destroys this epitope  
345 (**Figure 2H and Table S1**). We observed moderate changes in the length distribution  
346 (**Figure 2I and Figure S1**) or predicted binding affinities of peptides affected by ERAP2  
347 (Kruskal-Wallis  $P = 0.06$ )(**Figure 2J**). In contrast, comparison of the peptide motifs revealed  
348 evident and consistent changes at the N-terminal amino acid positions for ERAP2-sensitive  
349 9-11 mer peptides compared to peptides not affected by ERAP2 (**Figure 2K, Figure S2**),  
350 which aligns with the current view that ERAP2 trims the N-terminal amino acids of peptide  
351 substrates<sup>13</sup>. In detail, P1 of 9-mers revealed a contrasting residue preference for  
352 ERAP2-sensitive and ERAP2-dependent peptides (**Figure 3A**); Alanine(A), K, and R amino  
353 acids were seen significantly more often, while amino acids Y and F were seen significantly  
354 less often in sensitive peptides compared to non-affected peptides (Fisher’s Exact test,  $P_{adj}$   
355  $< 0.05$ , **Table S2**). In contrast, the most common P1 residues for dependent and non-affected  
356 peptides were Y and F (Y/F at P1; 45% and 30%, respectively) with F statistically more  
357 abundant at P1 and P2 in dependent peptides (**Figure 3A, Table S2-3**). Intriguingly, we  
358 detected no significant effects of ERAP2 at the N-terminal residue of the precursor peptide  
359 (position P-1)(**Figure S3**). Together these data show that ERAP2 has a selective effect on  
360 P1 of the HLA-A29 immunopeptidome in part by driving the depletion of peptides with  
361 preferred P1 substrates (e.g., A,K,R)<sup>42</sup> of ERAP2. This finding is consistent with previous  
362 reports that ERAP2 has primarily a destructive role by over-trimming susceptible peptide  
363 sequences and thus removing them from the immunopeptidome<sup>42</sup>.

364

365 *ERAP2 increases the abundance of peptides with a cryptic aromatic P2 motif*



366 ERAP2 trims peptides by sequestering them into the relatively large internal enzyme cavity<sup>13</sup>,  
367 where peptide side chains across the amino acid sequence can interact with pockets inside  
368 the cavity of ERAP2<sup>13,14</sup>. To evaluate if sequence-specific selectivity<sup>16</sup> by ERAP2 could be  
369 interpreted from the HLA-A29 peptidome, we conducted non-metric multidimensional scaling  
370 (NMDS) of all 9-mers<sup>29</sup>. This analysis projects peptides in two-dimensional space based on  
371 the similarity of the amino acid sequences (**Figure 3B**). Considering peptides with significant  
372 changes between ERAP2-WT and -KO conditions revealed distinct patterns for co-clustered  
373 (“similar”) peptides, with ERAP2-sensitive peptides located ‘away’ from ERAP2-dependent  
374 peptides (**Figure 3C**). To quantify these differences, we compared the amount of  
375 ERAP2-sensitive (**Figure 3B** in blue, n=155) versus ERAP2-dependent peptides (in red,  
376 n=164) across 5 clusters of peptides or ‘submotifs’<sup>32</sup>. This analysis revealed that  
377 ERAP2-sensitive peptides were overrepresented in cluster 3 ( $X^2$ , Bonferroni n=5 clusters,  
378  $P_{adj} = 0.046$ ) and ERAP2-dependent peptides overrepresented in cluster 2 ( $P_{adj} = 5.1 \times$   
379  $10^{-6}$ )(**Figure 3D**). Cluster 2 (n=172 in total) was defined by nonpolar aromatic residues F  
380 ( $P_{adj} = 1.0 \times 10^{-49}$ ), or Y ( $P_{adj} = 2.1 \times 10^{-22}$ ) at P2 (F/Y in 97% of peptides in cluster 2  
381 compared to 13% of peptides in all other clusters). ERAP2-dependent peptides (n=53) made  
382 up a considerable proportion of cluster 2 (unaffected peptides; n=106).  
383 Peptides in cluster 3 (n=356) were distinguished by a L at P7 (99% of peptides in cluster 3  
384 compared to 3% in other clusters,  $P_{adj} = 2.0 \times 10^{-230}$ )(**Figure 3C and Table S4**). Peptides in  
385 cluster 3 showed an overall higher binding score for HLA-A29:02 and higher hydrophobicity  
386 index compared to cluster 2 (**Figure 3E**). Note that submotifs cluster 2 and cluster 3 are  
387 *bona fide* submotifs of HLA-A29 that are highly reproducible in other datasets (cluster 1 and  
388 4 in **Figure S4** and cluster 1 and 3 in **Figure S5**). We further replicated our findings in  
389 HLA-A29 immunopeptidome data from Sanz-Bravo *et al.*<sup>18</sup> of ERAP2-competent and  
390 naturally ERAP2-deficient HLA-A29-positive cell lines (**Figure S4**) and, thus, demonstrate  
391 that ERAP2-positive cell lines commonly display selectively increased peptides with the motif  
392 of cluster 2. In contrast, ERAP1 did not selectively contribute to cluster 2 peptides (**Figure**  
393 **S5**). Also, the effect of ERAP1 and ERAP2 on HLA-A29 peptides correlated weakly  
394 (spearman rho=0.12, **Figure S6**), suggesting non-redundant effects for ERAP1 and 2 on the  
395 HLA-A29 peptidome. Although the analysis for 10-mers (n=235) in our dataset was  
396 considered to lack sufficient resolution to map the effects of ERAP2 on the submotif level,  
397 most of the ERAP2-dependent 10-mers also mapped to a submotif of HLA-A29 with F at P2  
398 (**Figure S7**). In summary, ERAP2 selectively increases the expression of HLA-A29-binding  
399 peptides with a submotif with aromatic residues at P2.

400

401 *ERAP2-dependent peptides of cluster 2 are selective for HLA-A29*

402 HLA class I peptides display promiscuity<sup>43</sup> and it is therefore of interest that HLA-A03:01 can  
403 present peptides with a Y at P $\Omega$  (similar to HLA-A29) only with L at P7 is present<sup>40</sup>. As  
404 expected, peptides from cluster 3 were also predicted as potential binders for HLA-A03:01,  
405 while cluster 2 peptides were not (**Figure S8**). To further test the HLA allotype restriction, we  
406 compared the binding scores for the differentially expressed peptides in cluster 2 and 3 for  
407 eight alleles which display binding motifs that overlap with HLA-A29:02 (based on Sarkizova  
408 *et al.*<sup>29</sup>). As shown in **Figure 3F**, ERAP2-sensitive peptides in cluster 3 show relatively good  
409 (MSi>0.8) binding scores for several other alleles (e.g., HLA-A30:02). Note that the  
410 S-antigen peptide VTLTCAFRY (in cluster 1) also shows good binding scores for other  
411 alleles (e.g., HLA-A30:02 MSi = 0.86). In contrast, ERAP2-dependent peptides from cluster

412 2 are predicted to poorly bind other class I alleles (median  $MSi < 0.6$ ) (**Figure 3F**). We  
413 extended this analysis to 95 alleles, which supported that the ERAP2-dependent peptides in  
414 cluster 2 are highly specific for HLA-A29 (**Figure S9**), with the exception of *HLA-C\*14:03*  
415 ( $>100$  times lower allele frequency compared to *HLA-A\*29:02* in European populations)  
416 (**Table S5**). The motif of cluster 2 peptides is present in the amino acid sequences of  
417 proteins encoded by  $\sim 300$  genes highly expressed in the retina (**Table S6**), of which putative  
418 HLA-A29-restricted peptides ( $MSi > 0.9$  for HLA-A29 and  $MSi < 0.6$  for 94 other alleles) were  
419 found in key factors in melanocyte biology (ARMC9, OCA2, SLC45A2, PLXNC1) (**Table S7**).  
420 This is of significance, because progressive loss of ocular melanocytes is a hallmark feature  
421 of BU<sup>5,44,45</sup>. We conclude that these data support that ERAP2 may apply selective pressure  
422 on the repertoire of HLA-A29.

423

424 *ERAP2 has similar effects on P1 across the HLA class I immunopeptidome*

425 Next, we were interested to see how ERAP2 affects the global peptidome of the other class I  
426 alleles. We use the flow-through of the HLA-A29-binding antibody immunopurifications to  
427 capture HLA class I molecules (**Figure 1D**). After filtering, a total of 10,233 unique peptides  
428 were identified between biological replicates (*Jaccard* similarity = 0.73) of which 6,678 8-11  
429 mers were considered for differential expression analysis (**Figure 1D**) (**Table S8**). A total of  
430 2,170 peptides were differentially expressed (**Table S8**). Notwithstanding allele-specific  
431 differences, K, R, and A were seen more often at P1 of ERAP2-sensitive peptides, while F  
432 and Y were typically underrepresented across the other five alleles (**Figure 4**) (**Tables**  
433 **S9-S13**). This was supported by a global assessment of all 9-11-mers (**Figure S10**). These  
434 results indicate that ERAP2 has globally similar effects on P1 across HLA allotypes and in  
435 line with the observation that the P1 across HLA class I ligands is enrichment for residues A,  
436 K, and R<sup>32</sup>.

437

438 *Internal sequence preferences of ERAP2 can be interpreted from the immunopeptidome*

439 We further conducted NMDS of the 9-mers for HLA-A03:01, HLA-B40:01, and HLA-B44:03  
440 (**Figure 5A, D, G and Figure S11**). The *HLA-C* peptidomes captured were too sparse to  
441 provide sufficient resolution. Investigation of HLA-A03:01 was hampered by a relatively high  
442 level of submotifs, characteristic for this allele<sup>29,32</sup>, in comparison to the density of the  
443 peptide data (**Figure 5B**), possibly due to loss of peptides by the initial immunopurification  
444 (**Figure 1D**). Regardless, ERAP2-sensitive peptides were enriched in cluster 4 ( $X^2$ ,  $P_{adj} =$   
445  $9.5 \times 10^{-3}$ ) (**Figure 5C**), but 37/92 (40%) peptides of cluster 4 were also in the HLA-A29  
446 peptidome (20 in cluster 3 of HLA-A29:02, **Figure 3C**). Reanalysis of immunopeptidome  
447 data from mono-allelic cell lines<sup>29</sup> support that HLA-A29:02 and HLA-A03:01 can each  
448 present peptides with the motif of cluster 4 (**Figure S12**) and demonstrates that ERAP2  
449 influences multiple alleles in part by peptide promiscuity. Considering the other clusters, no  
450 evidence for effects of ERAP2 beyond P1 could be observed.

451 In contrast to HLA-A03:01, strong residue preferences at P2 and P $\Omega$  of HLA-B40:01 resulted  
452 in few submotifs (**Figure 5D**). The distribution of ERAP2-sensitive 'away' from dependent  
453 peptides in two-dimensional space was reminiscent of the 'pattern' observed in the  
454 projection of HLA-A29:02 peptides (**Figure 5D**). Submotif analysis revealed that cluster 1  
455 and 4 were enriched for sensitive peptides and were distinguished by a preference for F or Y  
456 at P3 (**Figure 5E, F, Table S14**). Cluster 3 (enriched for dependent peptides) was

457 distinguished by a F/Y at P1 (**Figure 5E**), similar to the overall motif of ERAP2-dependent  
458 peptides (**Figure 3**).

459 Finally, HLA-B44:03 submotifs enriched for sensitive peptides (cluster 3 and cluster 2)  
460 (**Figure 5G-I**) showed a preference for F at P3, similar to HLA-B40:01(**Table S14**). These  
461 observations are consistent with recognition of P3 by a hydrophobic pocket revealed by  
462 structural analysis of ERAP2 (**Figure S13**). Note that cluster 4 was enriched for dependent  
463 peptides (**Figure 5I**) and enriched for E at P1 (**Table S14**), a negatively charged amino acid  
464 that is resistant to trimming by ERAP2. In summary, immunopeptidome data revealed  
465 internal peptide sequence preferences of ERAP2 that shape the ligand repertoire in a HLA  
466 class I-specific manner.

467

468

## 469 Discussion

470

471 In this study, we showed that ERAP2 shapes the HLA-A29 peptidome predominantly by  
472 over-trimming peptides carrying susceptible residues at their N-terminus while sparing others  
473 carrying a sub-optimal residue at the N-terminal positions. We showed that in the presence  
474 of ERAP2 preferred amino acids A,K, and R<sup>42</sup> are underrepresented, while amino acids F  
475 and Y are over-represented at P1, but that these effects on P1 are commonly shared with  
476 other class I alleles. Strikingly, we identified that ERAP2 specifically increases the  
477 abundance of peptides with a distinct submotif (cluster 2) defined by nonpolar aromatic  
478 residues F or Y at P2 that specifically binds to HLA-A29. Replication of these findings in  
479 non-related HLA-A29-positive cell lines suggests that these effects of ERAP2 on HLA-A29  
480 are common. Indeed, in known crystal structures of ERAP2 with peptides, the P2 side-chain  
481 is accommodated in a very shallow pocket that cannot easily accommodate large residues  
482 such as F and Y due to steric clashes with nearby enzyme residues<sup>13</sup> thus making peptides  
483 carrying large hydrophobic bulky residues at P2, poorer substrates (**Figure S13**). Note that  
484 we further showed that the effects of ERAP2 on this cluster of peptides is different from  
485 ERAP1, which did not show selectivity for this submotif of HLA-A29 (**Figure S5**). This fits  
486 with the observation that the pocket in ERAP1 that interacts with P2 provides more space for  
487 bulky residues<sup>14</sup>. In fact, using correlation as a metric of the effects of ERAP1 and ERAP2,  
488 we show that ERAP1 and ERAP2 show non-redundant effects on the HLA-A29 peptidome  
489 (**Figure S6**), which is in line with genetic studies that revealed that ERAP1 and ERAP2  
490 independently contribute to the disease risk for BU<sup>10</sup>.

491

492 Structural studies support that ERAP2 trims the N-terminal residues from peptide substrates  
493 by first sequestering the entire peptide sequence inside the enzyme's cavity. There, the  
494 peptide substrate interacts with amino acid side chains of the enzyme, which are considered  
495 to influence the stability of the interaction and thus the trimming rates of the peptides<sup>13,14</sup>.  
496 The exact internal peptide sequence preferences for ERAP2 remain poorly understood. In  
497 an attempt to map its relevance to antigen presentation, here we considered the entire  
498 peptide sequence to capture the full effects of ERAP2 on the class I immuno peptidomes,  
499 and identify functional submotifs which may be missed using traditional single residue or  
500 motif analysis. We describe highly reproducible motifs of HLA-A29 and identified that  
501 peptides that are destroyed by ERAP2 (i.e., 'sensitive' to trimming) showed a strong  
502 preference for Leucine at P7 and often are presented by multiple alleles (promiscuity).  
503 Although we formally cannot exclude the contribution of residual HLA-A29 molecules in the  
504 analysis of HLA-A03:01, data from single-HLA cell lines supported overlap in presented  
505 peptides with P7-L (**Figure S12**). Based on the crystal structure of ERAP2<sup>13</sup>, the sidechain  
506 P7 can be accommodated within a shallow hydrophobic pocket, which suggests that  
507 hydrophobic residues like Leucine would be preferred (**Figure S13**).

508

509 Thus, structural analysis indicates that L at P7 is near-optimal for trimming by ERAP2, while  
510 bulky residues at P2 (e.g., F) reduce trimming by ERAP2. Therefore, we hypothesize that  
511 the increase in peptides with bulky residues at P2 in the presence of ERAP2 is a result of the  
512 decreased availability of competing peptides with P7-L due to overtrimming by ERAP2.  
513 Importantly, nonpolar aromatic residues F or Y at P3 were associated with peptides that are  
514 destroyed in the HLA-B40:01 an HLA-B44:03 peptidome, which is consistent with recognition

515 of P3 by a hydrophobic pocket lined by two other aromatic residues (Tyr892 and Tyr455) that  
516 can make favourable pi-stacking interactions with the peptide aromatic side-chain (**Figure**  
517 **S13**). F at P3 was also the most common residue considering all 9-11 mers detected by  
518 immunoprecipitation of HLA class I (**Figure S10**). The seemingly contrasting preference of F  
519 dependent on the position in the peptide substrate, also suggests that predicting substrate  
520 specificity based on widely used fluorogenic aminopeptidase substrates (e.g., R-AMC) or  
521 peptide series that vary only the N-terminal residue may obscure the full breadth of substrate  
522 specificity for this amino peptidase. We do emphasize that the binding motif of HLA-A29  
523 (and other alleles investigated) can obscure the detection of the full internal sequence  
524 preferences of ERAP2, but using the presented peptides as a read-out provides the net  
525 effect of any internal sequence preferences on antigen presentation.

526 We showed that the ERAP-sensitive peptides presented by HLA-A29:02 are promiscuous  
527 based on their predicted binding scores for other class I alleles, and their detection in the  
528 HLA-A29-negative fraction in mass spectrometry analysis. Since these peptides are also  
529 characterized by P1 composition (e.g, A, K, R) that is shared with the other HLA allotypes  
530 investigated, it is tempting to speculate that HLA-A29 epitope destruction by ERAP2 is a  
531 canonical phenomenon common to class I alleles. This is supported by the observation that  
532 HLA class I ligands in general show an enrichment for residues A, K, and R at P1<sup>32</sup>, which  
533 are preferred substrates of ERAP2. High hydrophobicity of T-cell receptor contact residues in  
534 presented peptides - in particular a hydrophobic P7 - is associated with immunogenicity<sup>44,45</sup>.  
535 Perhaps a canonical function of ERAP2 is to destroy epitopes to lower the immunogenic  
536 index of peptide cargo presented. This is supported by observations in cancer  
537 immunotherapy, where high ERAP2 expression (the risk haplotype for BU) is a strong  
538 prognostic predictor of poor survival in patients receiving checkpoint inhibitor therapy to  
539 induce T-cell mediated antitumor immunity<sup>46</sup>. Of interest, the size of P1 of the presented  
540 peptide modulates the configuration of position 167 in HLA-A<sup>47</sup>, which was shown to critically  
541 influence T cell recognition<sup>47</sup>. F or Y at P1 gives a similar configuration for position 167,  
542 which is different from the conformation mediated by K and R at P1 in one study<sup>47</sup>, which  
543 suggests that the effects of ERAP2 on P1 may influence T cell receptor recognition.

544 Given that HLA-A29 is prerequisite for the development of BU, we hypothesize that disease  
545 mechanisms associated with antigen presentation are most likely driven by a limited set of  
546 epitopes (**Table S7**) because of promiscuity of peptides<sup>43</sup>. ERAP2 destroyed the only  
547 S-antigen peptide detected in the HLA-A29 peptidome, which also shows good binding  
548 scores for other alleles, suggesting that HLA-A29-mediated presentation of S-antigen  
549 fragments is less relevant during disease initiation, but perhaps more relevant in later stages  
550 of the disease after the blood retina barrier has been breached. This is supported by the  
551 common immune reactivity towards S-antigen in patients with clinically distinct phenotypes  
552 of uveitis.<sup>2</sup> Based on the submotifs of peptides (i.e. cluster 2), we hypothesize that  
553 'uveitogenic' HLA-A29-restricted peptides may more likely harbor a F or Y at P2. The  
554 importance of P2 is supported by the fact that fine mapping studies of the *MHC* linked BU  
555 risk to amino acid positions 62-Leu and 63-Gln of *HLA-A*<sup>48</sup>, which are unique to HLA-A29  
556 and directly interact with P2 of the anchoring peptide. Although the *HLA-C\*14:03* allele also  
557 showed good binding scores for the ERAP2-dependent peptides with F or Y at P2, *HLA-C*  
558 alleles are notoriously low expressed<sup>49</sup> and the allele frequency of *HLA-C\*14:03* is >100  
559 times lower compared to *HLA-A\*29:02*. Also, the peptidomes of HLA-A29 and HLA-C14:03  
560 are starkly different (Jaccard similarity index  $\pm 1\%$  using peptidome data from Sarkizova and

561 associates<sup>29</sup>) and T cells recognizing the same peptide in a different HLA molecule may not  
562 show immune reactivity. Regardless, we show that the amino acid sequence of  
563 retina-expressed genes contain peptides with the motif of cluster 2, which supports that  
564 ERAP2-mediated HLA-A29-restricted presentation of ocular epitopes could be a key disease  
565 mechanism for BU. Of course, functional experiments of antigen presentation in the eye and  
566 tetramer-analysis of T cell immunity to these putative epitopes is warranted. It is, however, of  
567 interest that among the predicted epitopes we found peptides derived from key factors in  
568 melanocyte biology. A hallmark feature of BU is the progressive loss of stromal melanocytes  
569 in the choroid corresponding to the characteristic cream-colored birdshot fundus  
570 lesions<sup>2,8,50,51</sup>, and BU has been associated with melanoma<sup>5,6,52</sup>.

571 Previous HLA peptidomic studies of ERAPs are based on single-HLA or long-established  
572 cell lines which after years of continuous cultivation are notorious for their profound  
573 chromosomal aberrations reported to also affect *ERAP* and *HLA* genes<sup>42,53-55</sup>. In addition,  
574 these studies have been conducted with label-free approaches using independent  
575 experimental runs, which makes accurate quantification of effects of ERAPs on the  
576 immunopeptidome more challenging. To study ERAPs in a physiologically more relevant  
577 environment, we exploited MS analysis using newly-established patient-derived cell lines  
578 and SILAC labeling to address several potential sources of ambiguity that are non-trivial to  
579 resolve with *in silico* methods, including often unaccounted genetic variability (i.e.,  
580 polymorphisms) in comparing different cell lines or quantitative error caused by the individual  
581 analysis of to be compared conditions. Regardless, the results in this study can also be  
582 influenced by several factors. Although abundant peptides are more likely to be sufficiently  
583 detected in individual elutions (~90% of peptides were reported before), less abundant  
584 peptides might be missed. This means that additional undiscovered effects of ERAP2 on the  
585 peptidomes investigated could be present. For example, we limited our labeling and analysis  
586 to peptides that contain F and/or Y for SILAC labeling, which obscured our capability to  
587 cover the majority of the HLA-B40:01 peptidome or potential uncharted domains of the  
588 peptidomes of the other alleles.

589 In conclusion, we show that ERAP2 significantly influences the immunopeptidome across  
590 the cellular HLA class I allotypes. The effects of ERAP2 are consistent with proposed  
591 ERAP2 sequence specificity and highlight that observed substrate-enzyme interactions can  
592 be translated to observed effects on the immunopeptidome. We have narrowed down the  
593 potential sequences for autoimmunity-inducing antigenic peptides based on the selective  
594 effect of ERAP2 on the peptide cargo of HLA-A29 in the pathogenesis of Birdshot Uveitis.

595

#### 596 *Acknowledgements*

597 Jonas J. W. Kuiper is supported by a VENI award from the Netherlands Organization for  
598 Scientific Research (N.W.O. project number 016.186.006). This work was further supported  
599 in part by *UitZicht* and *Stichting Lijf & Leven*. We express gratitude for constructive input  
600 from prof. Debbie van Baarle.

601

602

603

604 **Figures:**

605

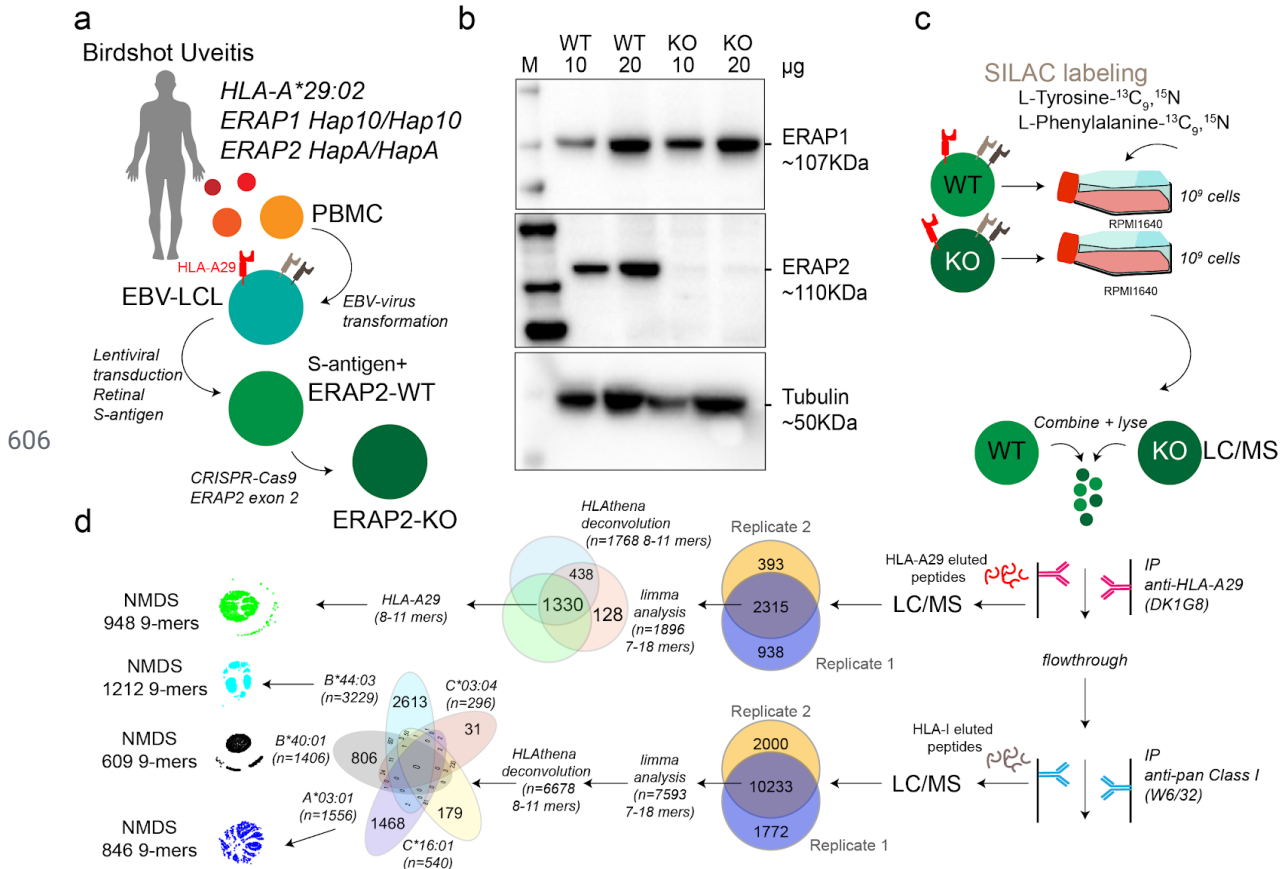

607 **Figure 1. Study design and sample preparation.** a) Design of the patient-derived model for antigen  
 608 processing by ERAP2. b) Western blot analysis of the protein expression of ERAP1, ERAP2, and  
 609 Tubulin as a control in the *HLA-A\*29:02*-positive Birdshot uveitis model cell lines in ERAP2-wild type  
 610 cells (WT) and cells after CRISPR-Cas9 mediated knock-out (KO) of ERAP2. The relative amount of  
 611 protein (in microgram) used for each lane is indicated. M; marker. c) Overview of cultured SILAC  
 612 labeled WT LCLs and unlabeled ERAP2 KO LCLs followed by combining the differentially labeled  
 613 conditions for lysis and immunoprecipitation of HLA-A29 and, subsequently other HLA class I  
 614 molecules, respectively. HLA-bound peptides were eluted, followed by LC/MS analysis. All steps in c  
 615 were conducted in two separate experiments to generate biological replicates. d) Schematic overview  
 616 of filtering steps of the identified peptides in this study. All peptides identified in both biological  
 617 replicates with high confidence were filtered for *limma* analysis (see methods). After differential  
 618 expression analysis, 8-11 mers were used to deconvolute and assign peptides to HLA alleles using  
 619 *HLATHena*. The venn diagrams indicate the overlap from data sets and subsetting for subsequent  
 620 analysis.

621

622

623

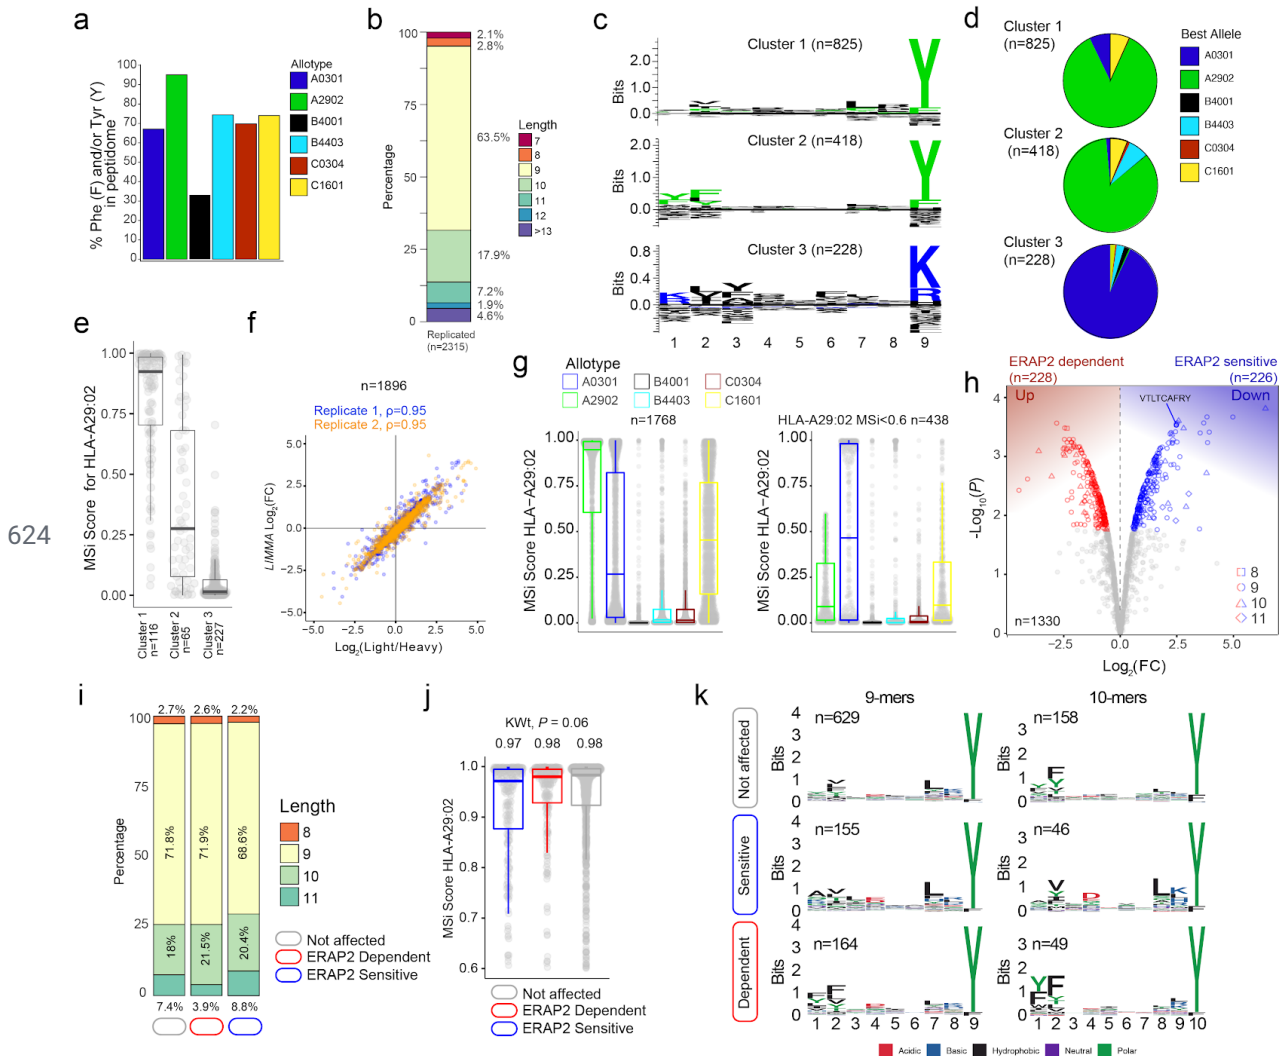

625 **Figure 2. ERAP2 shapes the HLA-A29 peptidome** a) The percentage of peptides that contain  
 626 Phenylalanine and/or Tyrosine in peptidomic studies of monoallelic cell lines by Sarkizova and  
 627 associates<sup>29</sup>. b) The length distribution of the 2315 peptides detected in both biological replicates. c)  
 628 *GibbsCluster 2.0* results for unbiased clustering of the 9-mers (n=1471 unique peptides) eluted with  
 629 the HLA-A29-binding monoclonal antibody. The motifs correspond with the *HLA-A* genotype  
 630 (*HLA-A\*29:02/HLA-A\*03:01*) of the sample. Cluster 1 and 2 match the binding motif of HLA-A29:02,  
 631 and Cluster 3 matches the binding motif of HLA-A03:01. d) Pie diagrams (percentages) of best  
 632 assigned alleles for the peptides in the clusters identified in c). The alleles which correspond to the  
 633 best score for each peptide ('Best Allele' output from *HLAthena*) was used to obtain the percentages  
 634 of peptides assigned to each of the six *HLA-A*, *-B*, and *-C* alleles. e) The binding scores for  
 635 HLA-A29:02 for peptides from the clusters identified in c) assigned to the other alleles. f) Strong  
 636 correlation between the raw peptide abundance data (n=1896) and normalized data by *limma* used in  
 637 the differential expression analysis. g) The 1768 8-11 mers before (left plot) and after (right plot)  
 638 filtering out the 1330 HLA-A29-binding peptides. h) Volcano plot of the differentially expressed 8-11  
 639 mers. In red are peptides that are increased in expression in the presence of ERAP2, while peptides  
 640 indicated in blue are decreased. The identified peptide VTLTCAFRY from the retinal S-antigen is  
 641 indicated. i) The length distribution and j) binding scores for HLA-A29 of the peptide groups identified  
 642 in h). k) Sequence logos generated using a non-redundant list of 9-mers and 10-mers (11-mers see  
 643 **Figure S2**).

644  
 645



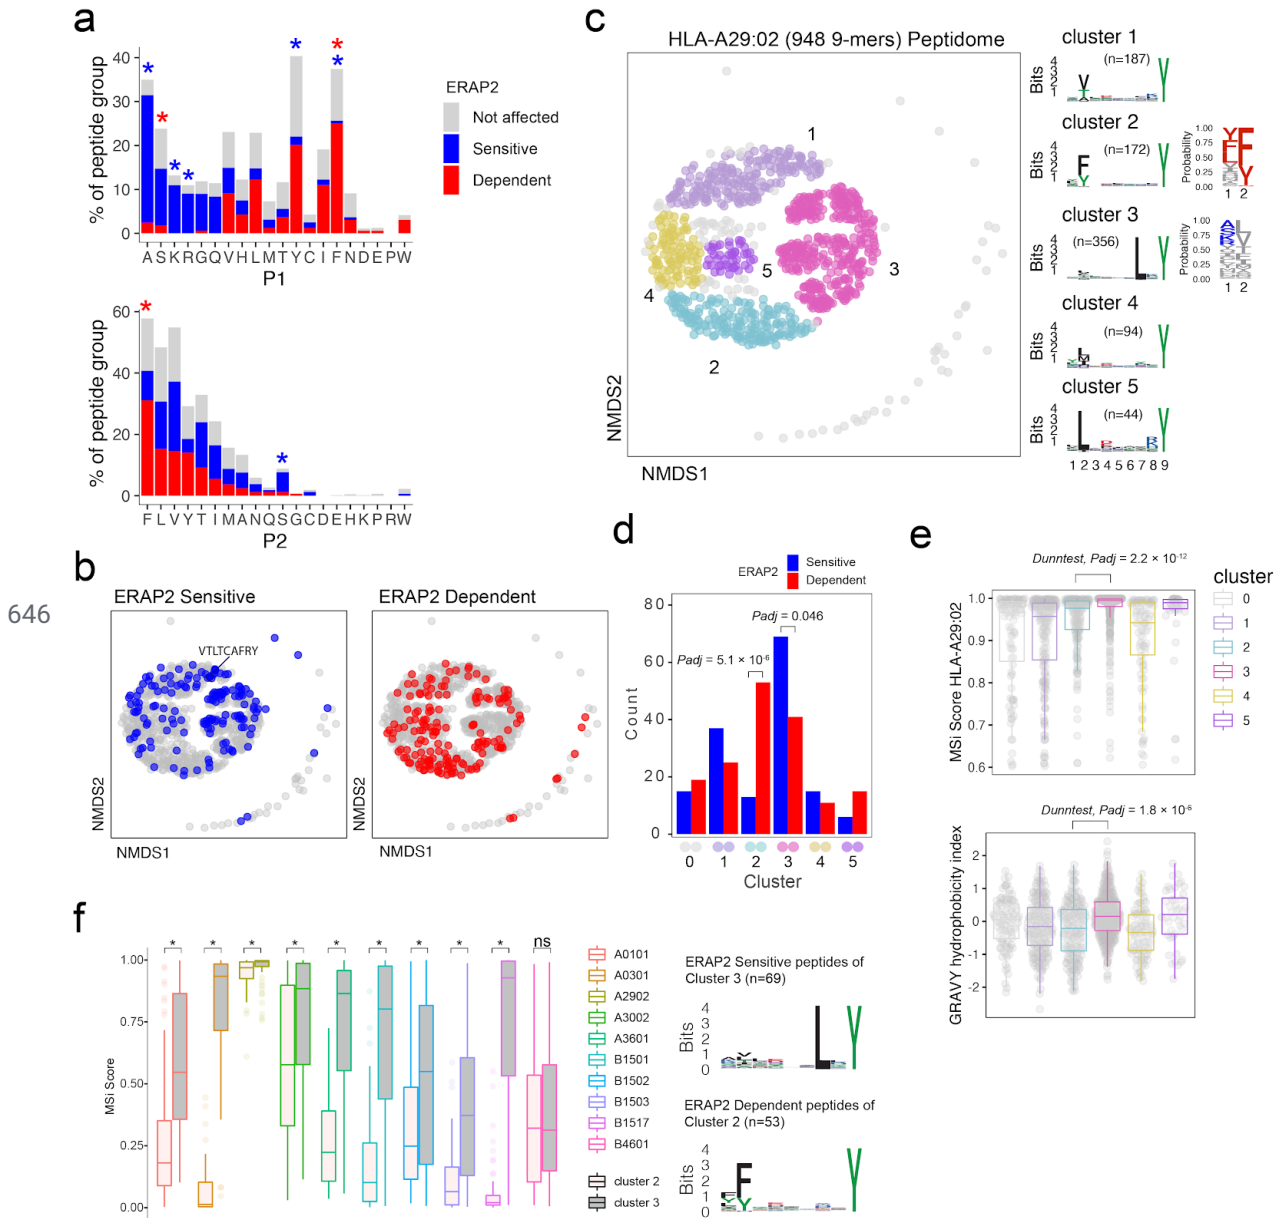

647 **Figure 3. ERAP2 facilitates the increased expression of a cryptic binding motif selective for**  
 648 **HLA-A29** **a**) Comparison of amino acid proportion at P1 and P2 of 9-mers (in percentage for each  
 649 group of peptides) between peptides that decrease in abundance ('sensitive' peptides, significant  
 650 changes indicated with the blue asterisk), peptides that increase in abundance ('dependent' peptides,  
 651 significant changes indicated with the red asterisk), compared to peptides not affected in ERAP2-WT  
 652 cells (in grey). The *P* values and summary statistics from the fisher tests are indicated in Table S2-3.  
 653 **b**) Non-metric multidimensional scaling (NMDS) visualization of 948 9-mer peptides for HLA-A29:02.  
 654 Peptide distance was defined on the basis of sequence similarity. Each circle represents a unique  
 655 9-mer peptide and is color-coded according to the effect of ERAP2; grey: not affected, blue:  
 656 ERAP2-sensitive peptide (peptides decrease in abundance in the ERAP2-WT condition compared to  
 657 the ERAP2-KO condition), red: ERAP2-dependent peptide (increased in abundance in the  
 658 ERAP2-WT condition compared to the ERAP2-KO condition). The peptide VTLTCAFRY from the  
 659 retinal S-antigen is indicated. **c**) NMDS plot of clusters of peptides for HLA-A29:02. Each circle  
 660 represents a unique 9-mer peptide and is color-coded according to the clustering by DBSCAN.  
 661 Sequence logos representing these clusters are shown (in Bits). A probability plot for amino acids at  
 662 position 1 (P1) and position 2 (P2) in 9-mers for cluster 2 and 3 are also shown. **d**) Comparison of the  
 663 number of ERAP2-sensitive and -dependent peptides in each peptide cluster from Figure 3C. *Padj* =

664 bonferroni corrected (n=clusters) P values from  $X^2$  tests. **e)** binding scores (in MSi metric calculated  
665 with *HLAthena*) for HLA-A29:02 and hydrophobicity index for each peptide cluster. **f)** Predicted  
666 binding scores (in MSi) for ERAP2-dependent peptides in cluster 2, and ERAP2-sensitive peptides in  
667 cluster 3 for HLA-A29:02 and 9 HLA alleles with relatively similar binding motifs (based on correlation  
668 in peptide space determined by Sarkizova *et al.*<sup>29</sup>). \*) indicates bonferroni corrected  $P < 0.05$  from a  
669 Dunn's Test.

670  
671  
672  
673  
674  
675  
676  
677  
678  
679  
680  
681  
682  
683  
684  
685  
686  
687  
688  
689  
690  
691  
692  
693  
694  
695  
696  
697  
698  
699  
700  
701  
702  
703  
704  
705  
706  
707  
708  
709  
710  
711

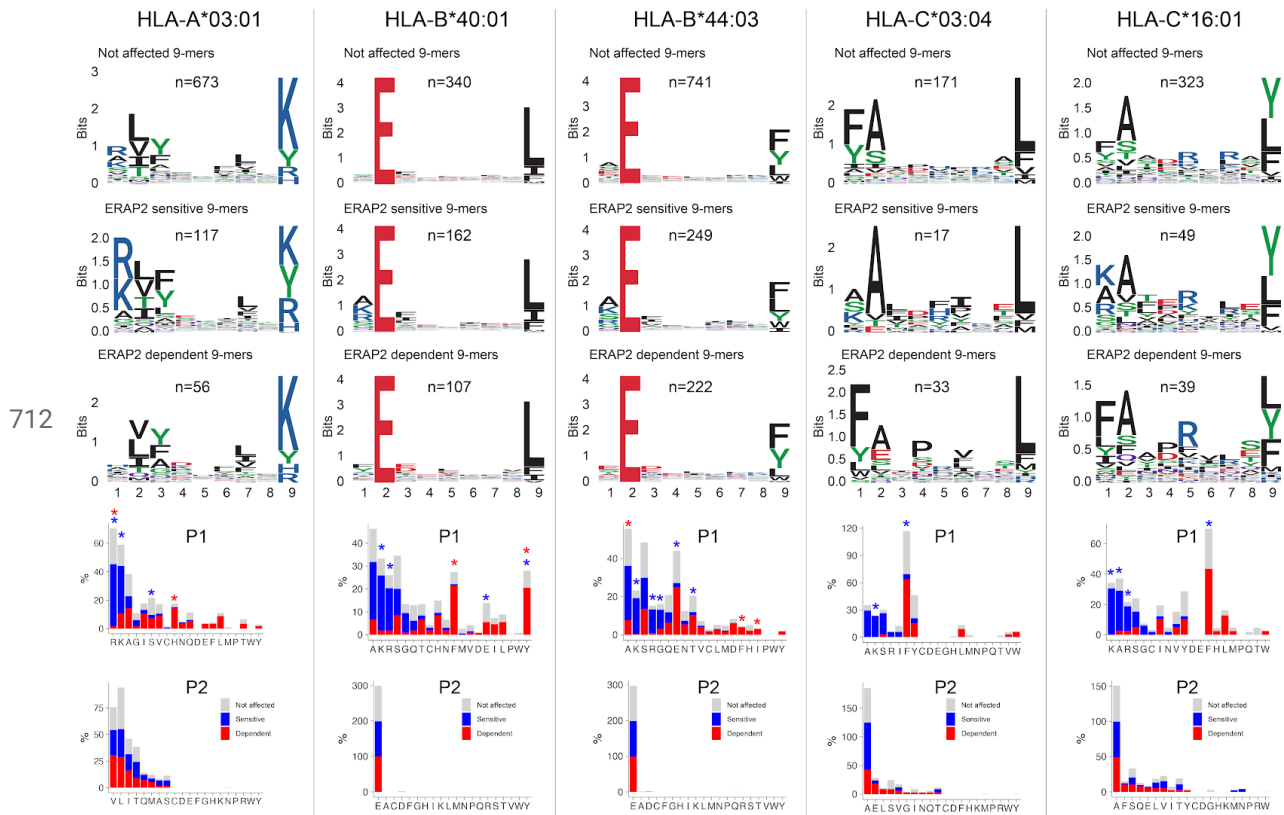

714 **Figure 4. ERAP2 shapes P1 across the HLA class I immunopeptidome.** Sequence motifs depict  
 715 specific amino acid preferences at P1-P9 and were generated from a non-redundant list of 9-mers for  
 716 each class I allele. Comparison of amino acid proportion at P1 and P2 of 9-mers (in percentage for  
 717 each group of peptides) between peptides that decrease in abundance ('sensitive' peptides,  
 718 significant changes indicated with the blue asterisk), peptides that increase in abundance ('dependent'  
 719 peptides, significant changes indicated with the red asterisk), compared to peptides not affected in  
 720 ERAP2-WT cells (in grey). The *P* values and summary statistics from the fisher tests are indicated in  
 721 **Table S7-S11.**

722

723

724

725

726

727

728

729

730

731

732

733

734

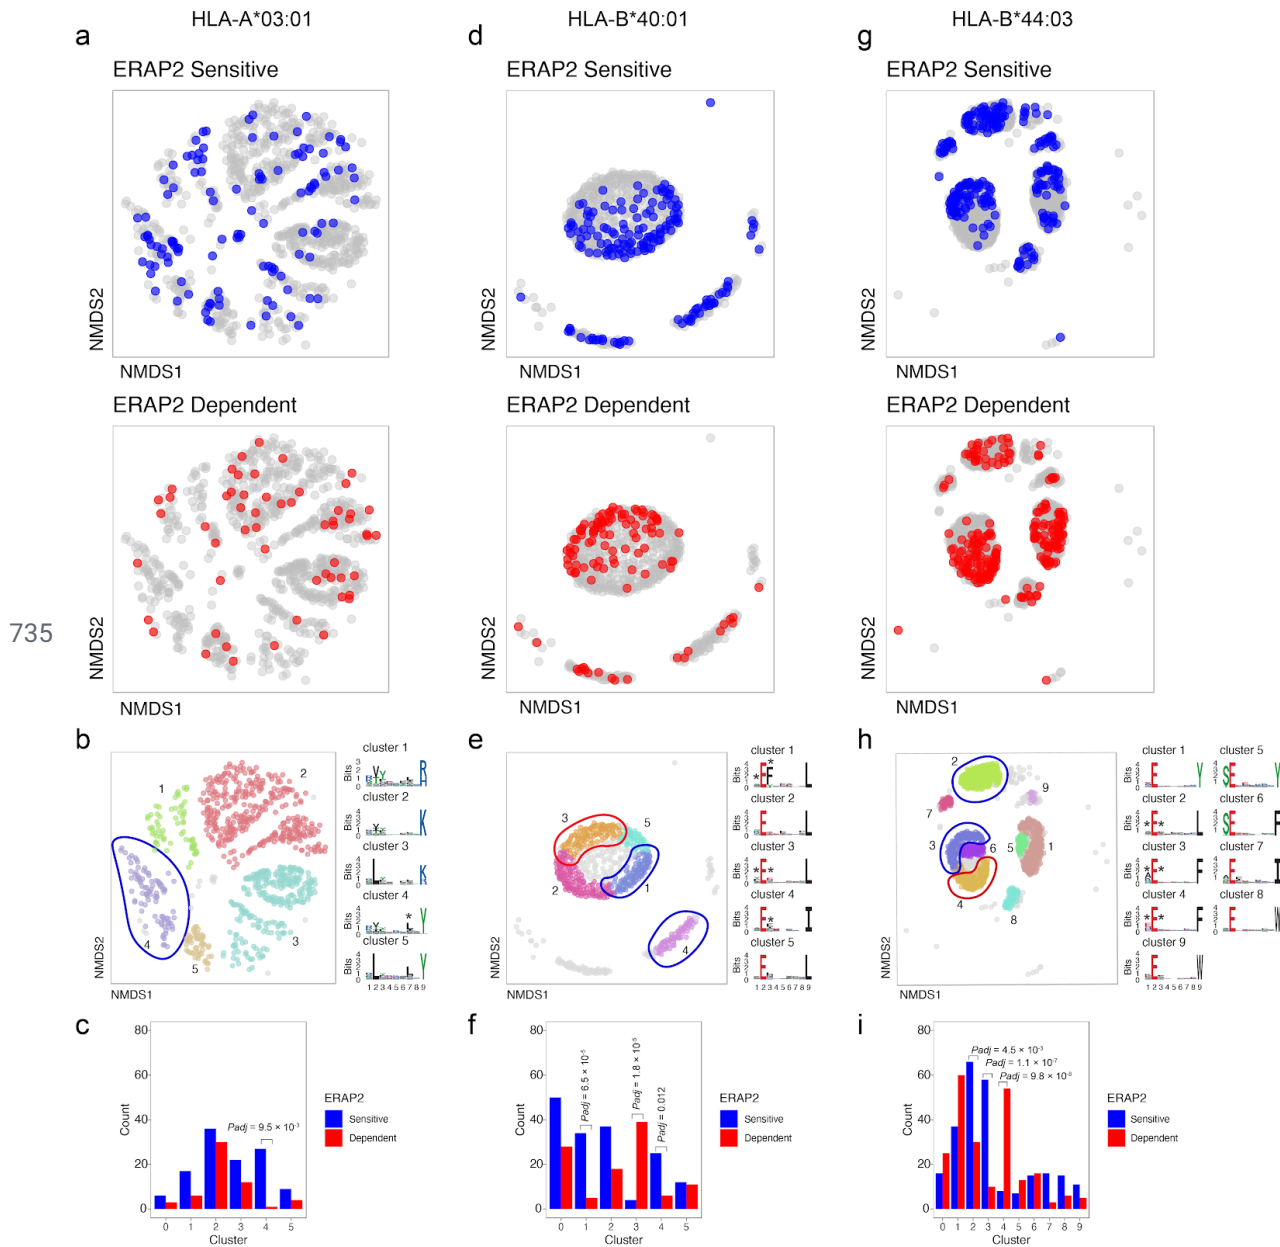

736 **Figure 5. NMDS plots showing 9-mer peptide clustering for individual HLA alleles.** Non-metric  
 737 multidimensional scaling (NMDS) visualization of 9-mer peptides and ERAP2 affected peptides for  
 738 *HLA-A\*03:01* (a,b,c), *HLA-B\*40:01* (d,e,f), and *HLA-B\*44:03* (g,h,i). Peptide distance was defined on  
 739 the basis of sequence similarity. Each circle represents a unique 9-mer peptide and is color-coded  
 740 according to the effect of ERAP2; grey: not affected, blue: ERAP2-sensitive peptides red:  
 741 ERAP2-dependent peptides. The NMDS plot of clusters of peptides for each class I allele peptide are  
 742 color-coded according to the clustering by DBSCAN. Sequence logos representing these clusters are  
 743 indicated. \* indicates significant changes of amino acid composition tested at P1, P2 and and/or P7  
 744 (Fisher's exact test corrected for 20 amino acid residues. Given the entropy-weighted clustering,  
 745 anchor positions P2 and P9 were not considered for testing. Clusters with significant differences in the  
 746 count of ERAP2-sensitive and -dependent peptides are highlighted with blue and red ellipses and  
 747 correspond with the barplots in c,f, and i. The predicted binding scores for each cluster is shown in  
 748 **Figure S11**. *P*<sub>adj</sub> = bonferroni corrected (n=clusters) *P* values from  $\chi^2$  tests. All other comparisons  
 749 were *P*<sub>adj</sub>>0.05

750

751

## 752 References

- 753 1. Minos, E. et al. Birdshot chorioretinopathy: Current knowledge and new concepts in pathophysiology,  
754 diagnosis, monitoring and treatment. *Orphanet J. Rare Dis.* 11, 1–17 (2016).
- 755 2. Kuiper, J., Rothova, A., de Boer, J. & Radstake, T. The immunopathogenesis of birdshot chorioretinopathy; a  
756 bird of many feathers. *Prog. Retin. Eye Res.* 44, 99–110 (2015).
- 757 3. Kuiper, J. J. W., Mutis, T., de Jager, W., de Groot-Mijnes, J. D. F. & Rothova, A. Intraocular interleukin-17 and  
758 proinflammatory cytokines in HLA-A29-associated birdshot chorioretinopathy. *Am. J. Ophthalmol.* **152**,  
759 177–182.e1 (2011).
- 760 4. Kuiper, J. J. W. et al. Detection of choroid- and retina-antigen reactive CD8+ and CD4+ T lymphocytes in the  
761 vitreous fluid of patients with birdshot chorioretinopathy. *Hum. Immunol.* **75**, 570–577 (2014).
- 762 5. Pulido, J. S. et al. Histological findings of birdshot chorioretinopathy in an eye with ciliochoroidal melanoma.  
763 *Eye* **26**, 862–865 (2012).
- 764 6. Gaudio, P. A., Kaye, D. B. & Crawford, J. B. Histopathology of birdshot retinochoroidopathy. *Br. J. Ophthalmol.*  
765 **86**, 1439–1441 (2002).
- 766 7. Nussenblatt, R. B., Mittal, K. K., Ryan, S., Richard Green, W. & Edward Maumenee, A. Birdshot  
767 Retinochoroidopathy Associated with Hla-A29 Antigen and Immune Responsiveness to Retinal S-Antigen. *Am. J.*  
768 *Ophthalmol.* **94**, 147–158 (1982).
- 769 8. Herbort, C. P. et al. Why birdshot retinochoroiditis should rather be called ‘HLA-A29 uveitis’? *Br. J. Ophthalmol.*  
770 **101**, 851–855 (2017).
- 771 9. Kuiper, J. J. W. et al. A genome-wide association study identifies a functional ERAP2 haplotype associated  
772 with birdshot chorioretinopathy. *Hum. Mol. Genet.* **23**, 6081–6087 (2014).
- 773 10. Kuiper, J. J. W. et al. Functionally distinct ERAP1 and ERAP2 are a hallmark of HLA-A29-(Birdshot) Uveitis.  
774 *Hum. Mol. Genet.* **27**, 4333–4343 (2018).
- 775 11. Saveanu, L. et al. Concerted peptide trimming by human ERAP1 and ERAP2 aminopeptidase complexes in  
776 the endoplasmic reticulum. *Nat. Immunol.* **6**, 689–697 (2005).
- 777 12. Andrés, A. M. et al. Balancing selection maintains a form of ERAP2 that undergoes nonsense-mediated  
778 decay and affects antigen presentation. *PLoS Genet.* 6, e1001157 (2010).
- 779 13 Mpakali, A. et al. Structural basis for antigenic peptide recognition and processing by Endoplasmic reticulum  
780 (ER) aminopeptidase 2. *J. Biol. Chem.* **290**, 26021–26032 (2015).
- 781 14 Giastas, P et al. Mechanism for antigenic peptide selection by endoplasmic reticulum aminopeptidase 1. *Proc*  
782 *Natl Acad Sci U S A.* Dec 16;116(52):26709–16. (2019)
- 783 15 Evnouchidou, I. et al. The internal sequence of the peptide-substrate determines its N-Terminus trimming by  
784 ERAP1. *PLoS One* **3**, (2008).
- 785 16 Birtley, J. R., Saridakis, E., Stratikos, E. & Mavridis, I. M. The crystal structure of human endoplasmic  
786 reticulum aminopeptidase 2 reveals the atomic basis for distinct roles in antigen processing. *Biochemistry* **51**,  
787 286–295 (2012).

- 788 17 Mavridis, G. *et al.* A systematic re-examination of processing of MHCI-bound antigenic peptide precursors by  
789 endoplasmic reticulum aminopeptidase 1. *J. Biol. Chem.* **295**, 7193–7210 (2020).
- 790 18 Sanz-Bravo, A. *et al.* Allele-specific alterations in the peptidome underlie the joint association of HLA-A\*29:02  
791 and endoplasmic reticulum aminopeptidase 2 (ERAP2) with birdshot chorioretinopathy. *Mol. Cell. Proteomics* **17**,  
792 1564–1577 (2018).
- 793 19 Alvarez-Navarro, C., Martín-Esteban, A., Barnea, E., Admon, A. & López De Castro, J. A. Endoplasmic  
794 reticulum aminopeptidase 1 (ERAP1) polymorphism relevant to inflammatory disease shapes the peptidome of  
795 the birdshot chorioretinopathy-associated HLA-A\*29:02 Antigen. *Mol. Cell. Proteomics* **14**, 1770–1780 (2015).
- 796 20 Georgiadis, D., Mpakali, A., Koumantou, D. & Stratikos, E. Inhibitors of ER Aminopeptidase 1 and 2: From  
797 Design to Clinical Application. *Curr. Med. Chem.* **26**, 2715—2729 (2019).
- 798 21. Anderson, K. S. *et al.* Impaired tumor antigen processing by immunoproteasome-expressing CD40-activated  
799 B cells and dendritic cells. *Cancer Immunol. Immunother.* **60**, 857–867 (2011)
- 800 22. Hussong, S. A. *et al.* A novel role for the immunoproteasome in retinal function. *Invest. Ophthalmol. Vis. Sci.*  
801 **52**, 714–723 (2011).
- 802 23. Hassan, C. *et al.* Accurate quantitation of MHC-bound peptides by application of isotopically labeled peptide  
803 MHC complexes. *J. Proteomics* **109**, 240–244 (2014).
- 804 24 Mulder, A. *et al.* Human monoclonal HLA antibodies reveal interspecies crossreactive swine MHC class I  
805 epitopes relevant for xenotransplantation. *Mol Immunol.* Jan;47(4):809-15. (2010)
- 806 25 Brosch, M., Yu, L., Hubbard, T. & Choudhary, J. Accurate and Sensitive Peptide Identification with Mascot  
807 Percolator. *J. Proteome Res.* **8**, 3176–3181 (2009).
- 808 26 Ritchie, M. E. *et al.* limma powers differential expression analyses for RNA-sequencing and microarray  
809 studies. *Nucleic Acids Res.* **43**, e47 (2015).
- 810 27 John D. Storey, Andrew J. Bass, Alan Dabney and David Robinson (2019). qvalue: Q-value estimation for  
811 false discovery rate control. R package version 2.14.1. <http://github.com/jdstorey/qvalue>
- 812 28 Kammers, K., Cole, R. N., Tiengwe, C. & Ruczinski, I. Detecting Significant Changes in Protein Abundance.  
813 *EuPA open proteomics* **7**, 11–19 (2015).
- 814 29 Sarkizova, S. *et al.* A large peptidome dataset improves HLA class I epitope prediction across most of the  
815 human population. *Nat. Biotechnol.* **38**, 199–209 (2020).
- 816 30 Andreatta, M., Lund, O. & Nielsen, M. Simultaneous alignment and clustering of peptide data using a Gibbs  
817 sampling approach. *Bioinformatics* **29**, 8–14 (2013).
- 818 31 Lisa McFerrin (2013). HDMD: Statistical Analysis Tools for High Dimension Molecular Data (HDMD). R  
819 package version 1.2.
- 820 32 Abelin, J. G. *et al.* Mass Spectrometry Profiling of HLA-Associated Peptidomes in Mono-allelic Cells Enables  
821 More Accurate Epitope Prediction. *Immunity* **46**, 315–326 (2017).
- 822 33 Kim, Y., Sidney, J., Pinilla, C., Sette, A. & Peters, B. Derivation of an amino acid similarity matrix for peptide:  
823 MHC binding and its application as a Bayesian prior. *BMC Bioinformatics* **10**, 394 (2009).

- 824 34 Goslee, S. C. & Urban, D. L. The ecodist Package for Dissimilarity-based Analysis of Ecological Data. *J. Stat.*  
825 *Software; Vol 1, Issue 7* (2007).
- 826 35 Hahsler, M., Piekenbrock, M. & Doran, D. dbscan: Fast Density-Based Clustering with R. *J. Stat. Software;*  
827 *Vol 1, Issue 1* (2019).
- 828 36 Christian Hennig (2020). fpc: Flexible Procedures for Clustering. R package version 2.2-5.  
829 <https://CRAN.R-project.org/package=fpc>
- 830 37 Omar Wagih (2017). ggseqlogo: A 'ggplot2' Extension for Drawing Publication-Ready Sequence Logos. R  
831 package version 0.1. <https://CRAN.R-project.org/package=ggseqlogo>
- 832 38 Osorio, D., Rondón-Villarreal, P. & Torres Sáez, R. Peptides: A Package for Data Mining of Antimicrobial  
833 Peptides. *R J.* **7**, 4–14 (2015).
- 834 39 Ogle, D.H., P. Wheeler, and A. Dinno. 2020. FSA: Fisheries Stock Analysis. R package version 0.8.30,  
835 <https://github.com/droglenc/FSA>.
- 836 40 Gfeller, D. *et al.* The Length Distribution and Multiple Specificity of Naturally Presented HLA-I Ligands. *J.*  
837 *Immunol.* **201**, 3705–3716 (2018).
- 838 41 Rene, C., Lozano, C., Villalba, M. & Eliaou, J.-F. 5' and 3' untranslated regions contribute to the differential  
839 expression of specific HLA-A alleles. *Eur. J. Immunol.* **45**, 3454–3463 (2015).
- 840 42 López de Castro, J. A. *et al.* Molecular and pathogenic effects of endoplasmic reticulum aminopeptidases  
841 ERAP1 and ERAP2 in MHC-I-associated inflammatory disorders: Towards a unifying view. *Mol. Immunol.* **77**,  
842 193–204 (2016).
- 843 43 Rao, X., Hoof, I., Costa, A. I. C. A. F., van Baarle, D. & Kesmir, C. HLA class I allele promiscuity revisited.  
844 *Immunogenetics* **63**, 691–701 (2011).
- 845 44 Chowell, D. *et al.* TCR contact residue hydrophobicity is a hallmark of immunogenic CD8+ T cell epitopes.  
846 *Proc. Natl. Acad. Sci. U. S. A.* **112**, E1754-62 (2015).
- 847 45 Riley, T. P. *et al.* Structure Based Prediction of Neoantigen Immunogenicity. *Front. Immunol.* **10**, 2047 (2019).
- 848 46 Lim, Y. W. *et al.* Germline genetic polymorphisms influence tumor gene expression and immune cell  
849 infiltration. *Proc. Natl. Acad. Sci. U. S. A.* **115**, E11701–E11710 (2018).
- 850 47 Coles, C. H. *et al.* T Cell Receptor interactions with Human Leukocyte Antigen govern indirect peptide  
851 selectivity for the cancer testis antigen MAGE-A4. *J. Biol. Chem.* (2020)
- 852 48 Márquez, A. *et al.*, New insights into the genetic component of non-infectious uveitis through an Immunochip  
853 strategy. *J Med Genet.* Jan;54(1):38-46. (2017)
- 854 49 Apps, R. *et al.* Relative Expression Levels of the HLA Class-I Proteins in Normal and HIV-Infected Cells. *J.*  
855 *Immunol.* 1403234 (2015)
- 856 50 Elahi, S. & Herbort, C. P. J. Vogt-Koyanagi-Harada Disease and Birdshot Retinochoroidopathy, Similarities  
857 and Differences: A Glimpse into the Clinicopathology of Stromal Choroiditis, a Perspective and a Review. *Klin.*  
858 *Monbl. Augenheilkd.* 236, 492–510 (2019).
- 859 51 Papadia, M. & Herbort, C. P. New concepts in the appraisal and management of birdshot retinochoroiditis, a  
860 global perspective. *Int. Ophthalmol.* **35**, 287—301 (2015).

861 52 Hassman, L., Warren, M., Huxlin, K. R., Chung, M. M. & xu, lei. Evidence of melanoma immunoreactivity in  
862 patients with Birdshot retinochoroidopathy. *Invest. Ophthalmol. Vis. Sci.* **58**, 5745 (2017)

863 53 Chen, L. *et al.* Identification of an Unconventional Subpeptidome Bound to the Behçet's Disease-associated  
864 HLA-B\*51:01 that is Regulated by Endoplasmic Reticulum Aminopeptidase 1 (ERAP1). *Mol. Cell. Proteomics* **19**,  
865 871—883 (2020).

866 54 Guasp, P. *et al.* Redundancy and Complementarity between ERAP1 and ERAP2 revealed by their effects on  
867 the behcet's disease-associated HLA-B\*51 peptidome. *Mol. Cell. Proteomics* **18**, 1491–1510 (2019).

868 55 Heterozygosity of the 721.221-B\*51:01 Cell Line Used in the Study by Guasp *et al.* (Arthritis Rheumatol,  
869 February 2016). *Arthritis Rheumatol.* **69**, 686 (2017).



870

871

872 **Supplemental Info for:**

873 **ERAP2 facilitates a subpeptidome of Birdshot Uveitis-associated**

874 **HLA-A29**

875

876

877 W.J. Venema<sup>1,2</sup>, S. Hiddingh<sup>1,2</sup>, J.H. de Boer<sup>1</sup>, F.H.J. Claas<sup>3</sup>, A Mulder<sup>3</sup>, A.I. Den Hollander<sup>4</sup>,  
878 E. Stratikos<sup>5</sup>, S. Sarkizova<sup>6,7</sup>, G.M.C. Janssen<sup>8</sup>, P.A. van Veelen<sup>8</sup>, J.J.W. Kuiper<sup>1,2\*</sup>

879

880 9. Department of Ophthalmology, University Medical Center Utrecht, University of  
881 Utrecht, Utrecht, Netherlands.

882 10. Center for Translational Immunology, University Medical Center Utrecht, University of  
883 Utrecht, Utrecht, Netherlands.

884 11. Department of Immunology, Leiden University Medical Center, Leiden, the  
885 Netherlands

886 12. Department of Ophthalmology, Donders Institute for Brain, Cognition and Behaviour,  
887 Department of Human Genetics, Radboud University Medical Center, Nijmegen, The  
888 Netherlands.

889 13. National Center for Scientific Research Demokritos, Greece

890 14. Department of Biomedical Informatics, Harvard Medical School, Boston, MA, USA.

891 15. Broad Institute of MIT and Harvard, Cambridge, MA, USA.

892 16. Center for Proteomics and Metabolomics, Leiden University Medical Center, Leiden,  
893 the Netherlands.

894

895 \* Corresponding author; email: [J.J.W.Kuiper@umcutrecht.nl](mailto:J.J.W.Kuiper@umcutrecht.nl)

896

897

898

899

900

901

902

903

904

905

906

907

908

909

910

911

912

913

914

915

916 **Supplemental Methods and Info:**

917

918 *Lentiviral vector production*

919 HEK-293T cells were seeded into 10 cm dishes ( $2 \times 10^6$  cells/dish) and cultured in Dulbecco's  
920 Modified Eagle Medium (DMEM, Thermo Fisher Scientific). The next day, 293T cells were  
921 co-transfected with 2  $\mu\text{g}$  transfer vector (Lenti ORF clone of Human S-antigen mGFP  
922 tagged, RC220057L2 from Origene) and components of 2nd generation packaging vectors:  
923 8.33  $\mu\text{g}$  psPAX2 packaging vector and 2.77  $\mu\text{g}$  pMD2.G envelope vector at a ratio of 4:1.  
924 Transfection was done in serum-free DMEM using Lipofectamine 2000 (Thermo Fisher  
925 Scientific) according to manufacturer's instructions. Medium was replaced with 10 mL DMEM  
926 supplemented with 10% FBS and incubated at  $37^\circ\text{C}$ , 5%  $\text{CO}_2$  after 24 hours. The  
927 conditioned medium containing lentiviral particles was collected 48 hours after transfection  
928 and an additional 10 mL of fresh culture medium was added to the cells. After 12 hours,  
929 harvested supernatants were combined and cleared by centrifugation at 1500 rpm for 5  
930 minutes at  $4^\circ\text{C}$  then passed through a  $0.45 \mu\text{m}$  filter.

931 Concentration of lentiviral supernatants using ultracentrifugation was performed with a  
932 Beckman Coulter Optima centrifuge using a SW32Ti rotor. Filtered supernatant was added  
933 to 38.5 mL Ultra-Clear tubes (Beckman Coulter). Centrifugation was performed for 120  
934 minutes at 32,000 rpm. Supernatant was completely removed and virus pellets were  
935 resuspended in 1 mL RPMI (containing 10% FBS and 1% penicillin/streptomycin) and stored  
936 at  $-80^\circ\text{C}$ .

937

938 *Lentiviral transduction of S-antigen in EBV-LCL*

939 To obtain stable cell lines overexpressing S-antigen, EBV-LCLs were transduced with the  
940 concentrated lentiviral supernatants. To transduce EBV-LCLs,  $1 \times 10^6$  cells were seeded in a  
941 24-wells plate with the lentivirus and a final polybrene concentration of 6  $\mu\text{g}/\text{mL}$ . After 24  
942 hours, the medium was replaced and the cells were cultured for another 3 days, without  
943 exceeding a cell concentration of  $1.5 \times 10^6$  cells/mL. Transduction efficiency was monitored  
944 by fluorescent light microscopy. GFP-positive EBV-LCLs were sorted using the BD  
945 FACSaria™ III sorter and S-antigen expression levels were detected by western blot.

946

947 *Differential expression analysis of peptides using limma*

948 For differential expression analysis we used the workflow from Kammers *et al.*, 2015 available at  
949 [http://www.biostat.jhsph.edu/~kkammers/software/eupa/R\\_guide.html](http://www.biostat.jhsph.edu/~kkammers/software/eupa/R_guide.html). Their method exploits  
950 the R package *limma* for shrinking a peptide's sample variance towards a pooled estimate  
951 that boosts power for stable detection of (truly) significant changes in small proteomic data  
952 sets. Peptide data were preprocessed using the *read.peptides()* function, which excludes  
953 peptides with missing values (i.e., not detected in either the light or heavy channel). We  
954 computed dummy variables for the "Isolation.Interference", "Quan.Usage", "Quan.info"  
955 variables, because quality control of the input data was completed as described in the main  
956 manuscript. The peptide sequence was used as the "Protein.Group.Accessions" variable.  
957 Overlapping peptide data from the biological replicates were independently normalized using  
958 the *quantify.proteins()* function. Following the workflow of Kammers *et al.*, we used peptides  
959 (with a Mascot Percolator  $q < 0.01$  in all analyses) detected in both biological replicates (i.e.,  
960 peptides unique to one of the conditions are left out for normalization and statistical  
961 analysis). For example, for peptides detected by DK1G8 (anti-HLA-A29) with a *HLAthena*

962 binding score [MSi]>0.6 for HLA-A\*29:02 a total of 1330 peptides were detected in both  
963 channels, while 41 peptides in either the light or heavy channel (with consistent detection in  
964 the same channel in both experiments) and were not considered for statistical analyses. We  
965 blocked for batch effect (two independent experiments) in *limma* by including them in the  
966 design matrix. HLA-A29 peptidome analysis considering also peptides detected in either the  
967 heavy or light channels is provided in **Figure S1**. Here, we used dummy variables for the  
968 moderate q-value (set to  $1 \times 10^{-6}$ ) and  $\log_2FC$  ( $\log_2FC = -6.6$  for peptides only detected in the  
969 ERAP2 KO-cell line and  $\log_2FC = 6.6$  for peptides detected only in the ERAP2 WT-cell line),  
970 because these parameters were only used to subset peptides unique to either of the  
971 conditions (using moderate  $q < 0.01$  as a threshold) together with the differentially expressed  
972 peptides detected in both channels. Also, although Mascot Percolator exploits a number of  
973 relevant peptide features and has been shown to be superior in accurate peptide  
974 identification compared to previous Mascot scoring based on one metric (Borsch et  
975 al.,2009), we also conducted this analysis of the HLA-A29 peptidome using the the  
976 percolator q-value in conjunction with the Mascot ions score >30, which showed similar  
977 effects for ERAP2 at the submotif level as the analysis using the percolator q-value (see  
978 **Figure S1**).

979  
980  
981  
982  
983  
984  
985  
986  
987  
988  
989  
990  
991  
992  
993  
994  
995  
996  
997  
998  
999  
1000  
1001  
1002  
1003  
1004  
1005  
1006

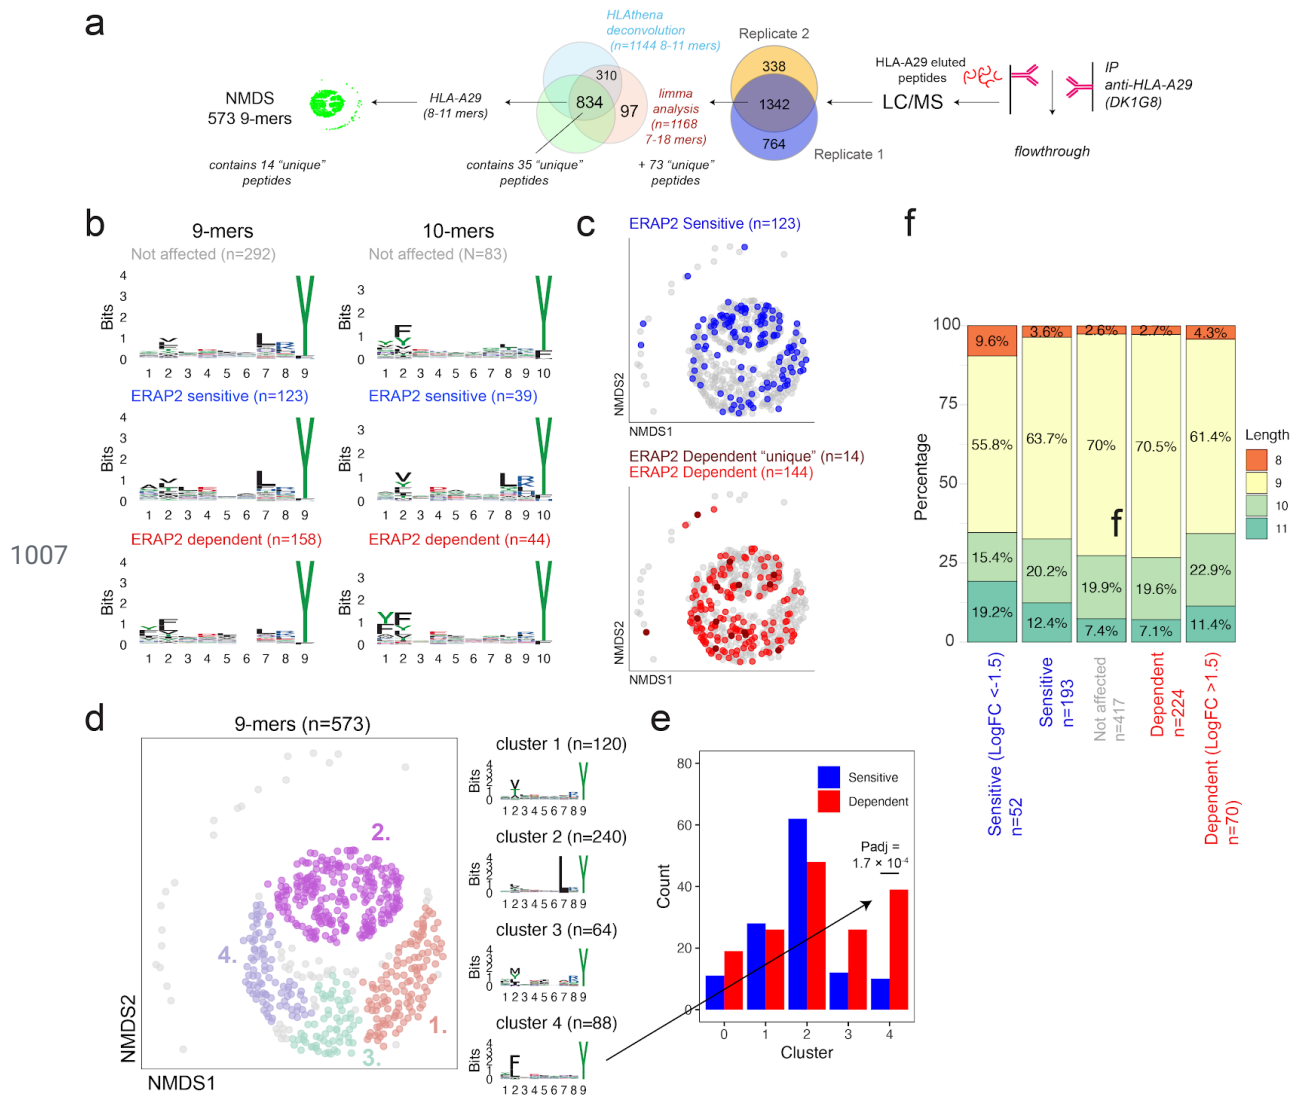

1008 **Supplemental Figure S1.** HLA-A29 peptidome data analysis including peptides unique to either  
 1009 ERAP2-KO or ERAP2-WT cells. **a)** A total of 1342 peptides overlapping between the two biological  
 1010 replicates with percolator  $q < 0.01$  and Mascot Ions score  $> 30$ , were filtered according to the steps  
 1011 indicated. Note that after the limma analysis, the 73 “unique” peptides detected in either the heavy or  
 1012 light labeled conditions (with consistent detection in the same channel in both experiments) were  
 1013 added to the dataset before deconvolution with *HLAthena* to filter for HLA-A29 ligands **b)** The  
 1014 sequence logos for 9-mers and 10-mers in this dataset. ERAP2-sensitive peptides are peptides that  
 1015 decrease in abundance in the presence of ERAP2 and ERAP2-dependent peptides increase in  
 1016 abundance in the presence of ERAP2. **c)** Nonmetric multidimensional scaling of 573 9-mers in this  
 1017 dataset. The ERAP2-sensitive and ERAP2-dependent peptides are indicated in blue and red,  
 1018 respectively. Peptides uniquely identified in the ERAP2 WT-condition are shown in dark red (n=14). **d)**  
 1019 Four clusters were estimated (eps parameter for DBSCAN, using  $k=5$ ) using the elbow method. The  
 1020 sequence logos for each cluster are indicated on the right. **e)** Comparison of the number of  
 1021 ERAP2-sensitive and ERAP2-dependent peptides in each peptide cluster identified in **b)**.  $P_{adj} =$   
 1022 bonferroni corrected ( $n = \text{clusters}$ )  $P$  values from  $\chi^2$  tests. All other comparisons were  $P_{adj} > 0.05$ . **f)** The  
 1023 percentage of 8-11-mers in peptides sets of this dataset. This analysis shows length dependent  
 1024 effects seen for ERAP2 in an hypoactive ERAP1 background.  
 1025

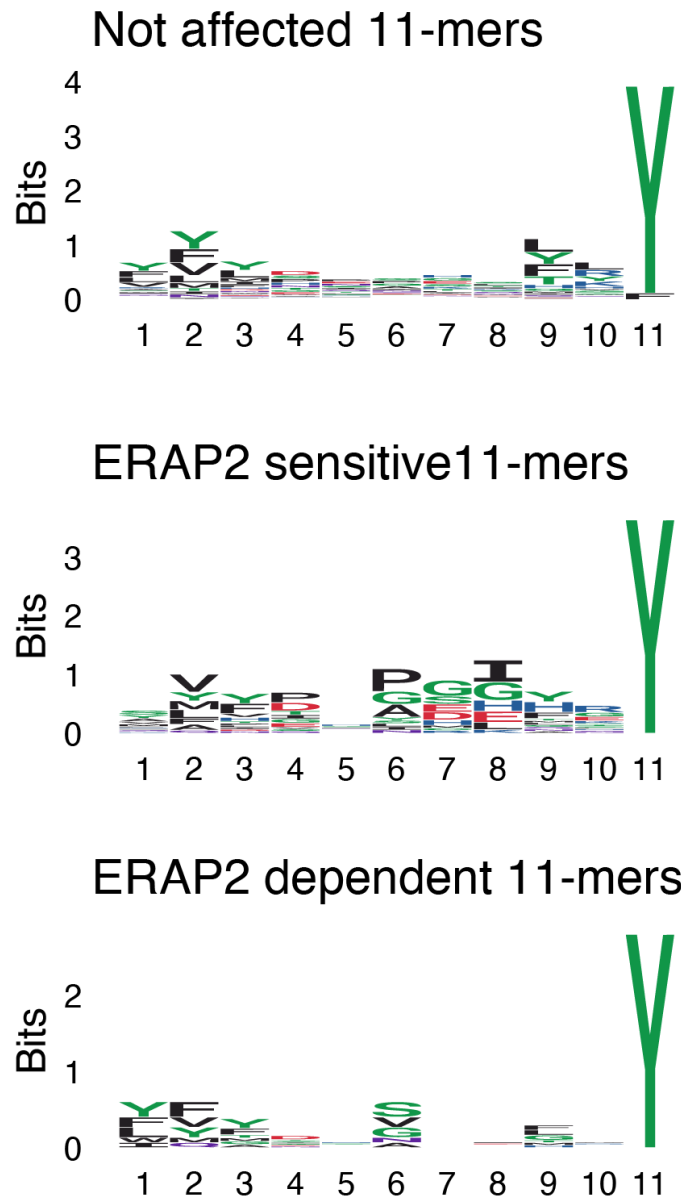

1026

1027 **Supplemental Figure S2.** The sequence logos for non-redundant 11-mers from HLA-A29. Peptides  
1028 that decrease in the presence of ERAP2 are termed ERAP2-sensitive, peptides that increase in  
1029 abundance are termed ERAP2-dependent. Peptides that did not change in abundance in the  
1030 presence of ERAP2 are termed 'not affected'.

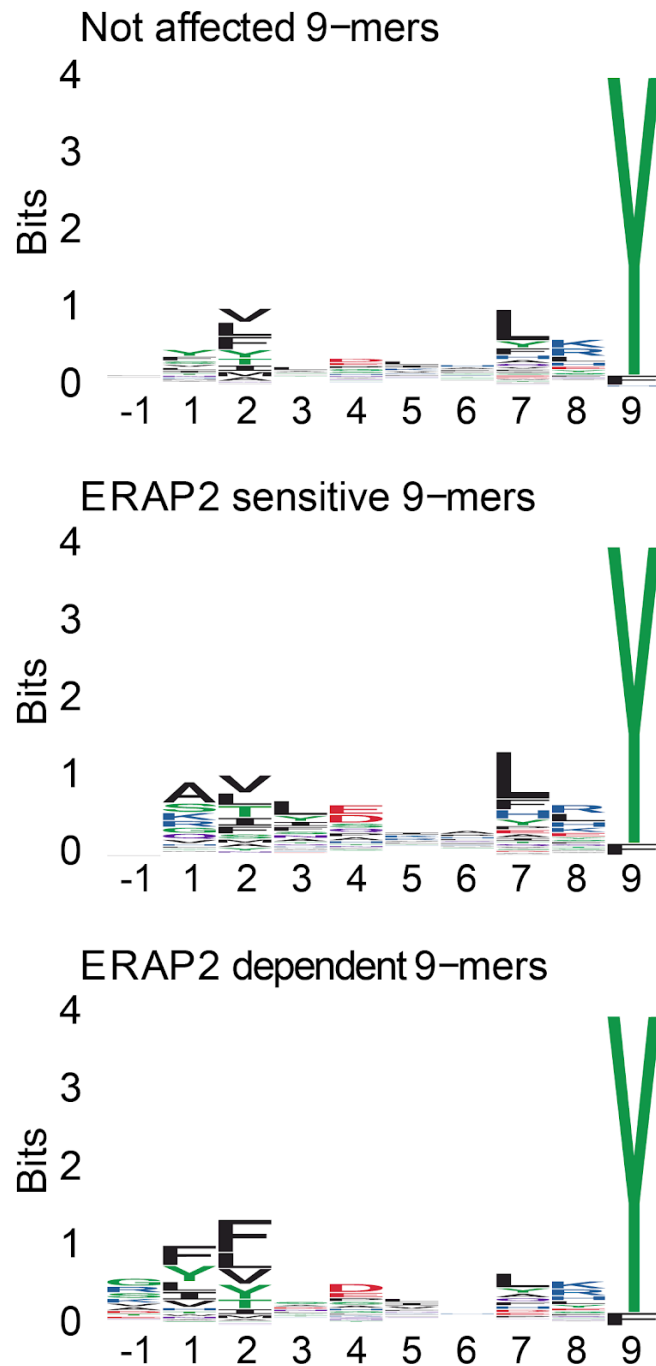

1031

1032 **Supplemental Figure S3.** The sequence logos for 948 non-redundant 9-mers and their designated  
1033 P-1 derived from the amino acid sequence of the putative proteins. Peptides that decrease in the  
1034 presence of ERAP2 are termed ERAP2-sensitive, peptides that increase in abundance are termed  
1035 ERAP2-dependent. Peptides that did not change in abundance in the presence of ERAP2 are termed  
1036 'not affected'.

1037

1038

1039

1040

1041

1042

1043

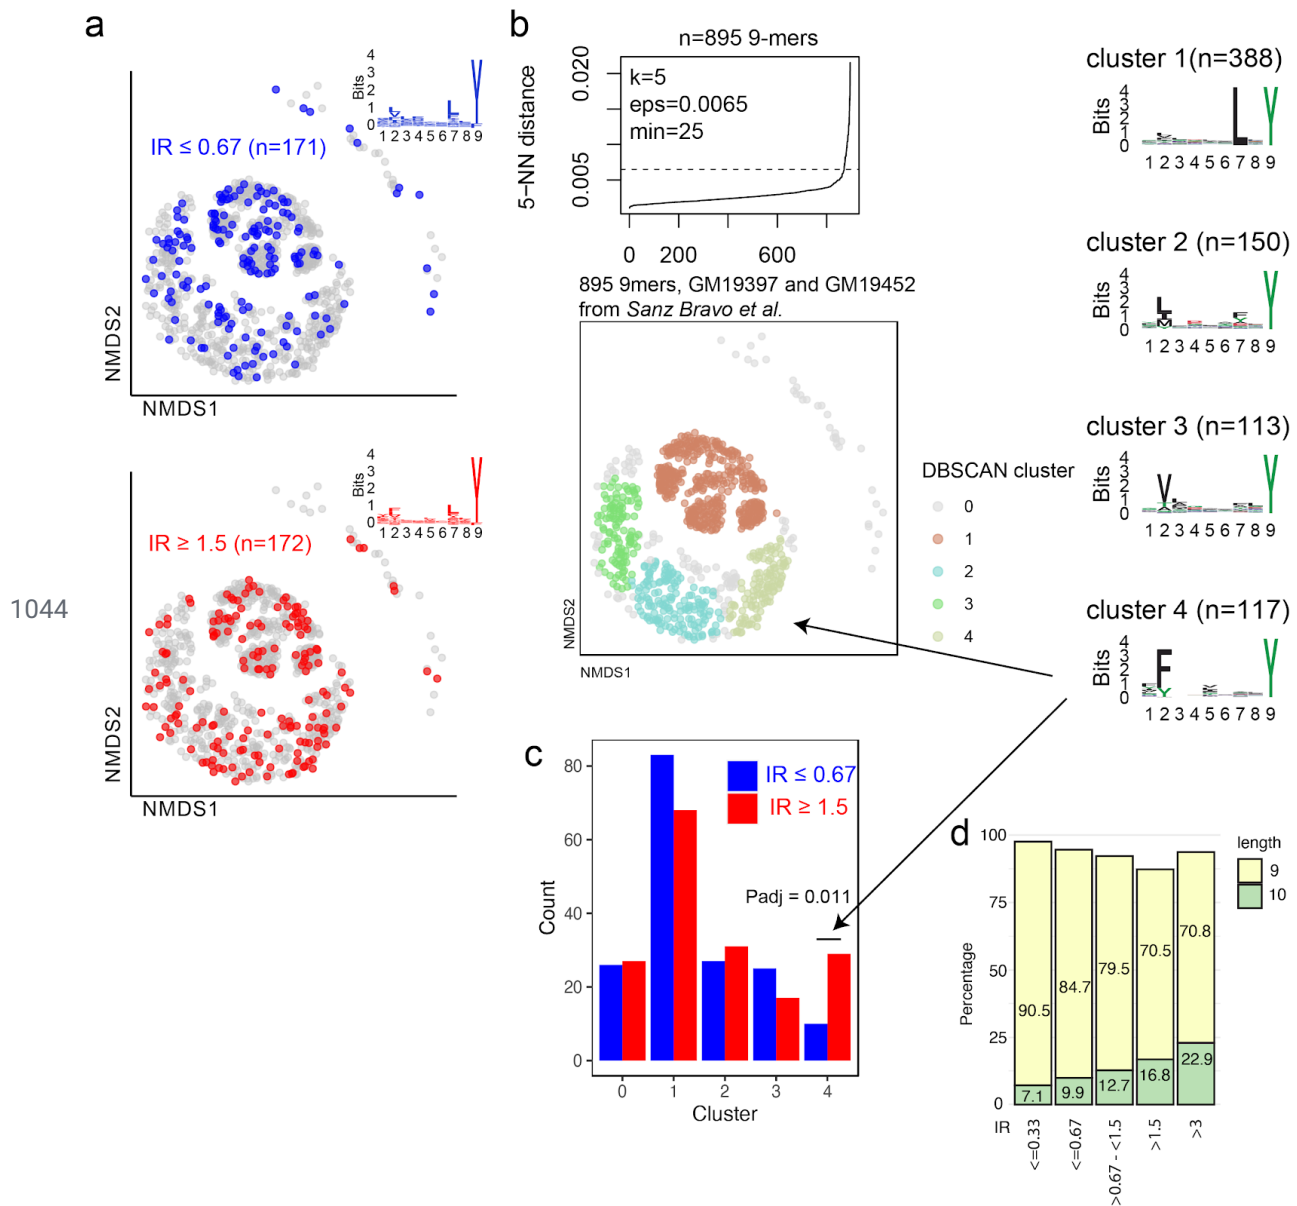

1045 **Supplemental Figure S4. a)** Non-metric multidimensional scaling of the 895 shared 9-mers eluted  
 1046 from the HLA-A29-positive cell lines GM19452 (ERAP2-expressing cell line) and GM19397  
 1047 (ERAP2-deficient cell line). The 895 9-mers were derived from supplemental data from *Sanz-Bravo et*  
 1048 *al., 2018* In this study, the normalized intensity ratio (GM19452/GM19397) of each peptide in the two  
 1049 cell lines was used to infer the relative abundance of each peptide, which we adapted to assign  
 1050 peptides as ERAP2-sensitive (IR  $\leq 0.67$ , n=171 peptides) or ERAP2-dependent (IR  $\geq 1.5$ , 172  
 1051 peptides). **b)** Four clusters were estimated (eps parameter for DBSCAN, using k=5, based on Figure  
 1052 3C) using the elbow method. The sequence logos for each cluster are indicated on the right. Cluster 0  
 1053 indicates unassigned peptides. **c)** Comparison of the number of ERAP2-sensitive and  
 1054 ERAP2-dependent peptides in each peptide cluster identified in *b*. *Padj* = bonferroni corrected  
 1055 (n=clusters) *P* values from  $\chi^2$  tests. All other comparisons were *Padj*>0.05. **d)** The percentage of  
 1056 9-mers and 10-mers in peptides sets using different cut-offs for the intensity ratio (IR). This analysis  
 1057 confirms the length dependent effects seen for ERAP2 in an active ERAP1 background (as reported  
 1058 by *Sanz-Bravo et. al., 2018*) in these cell lines that are homozygous for allotypes with high enzymatic  
 1059 activity.

1060

1061

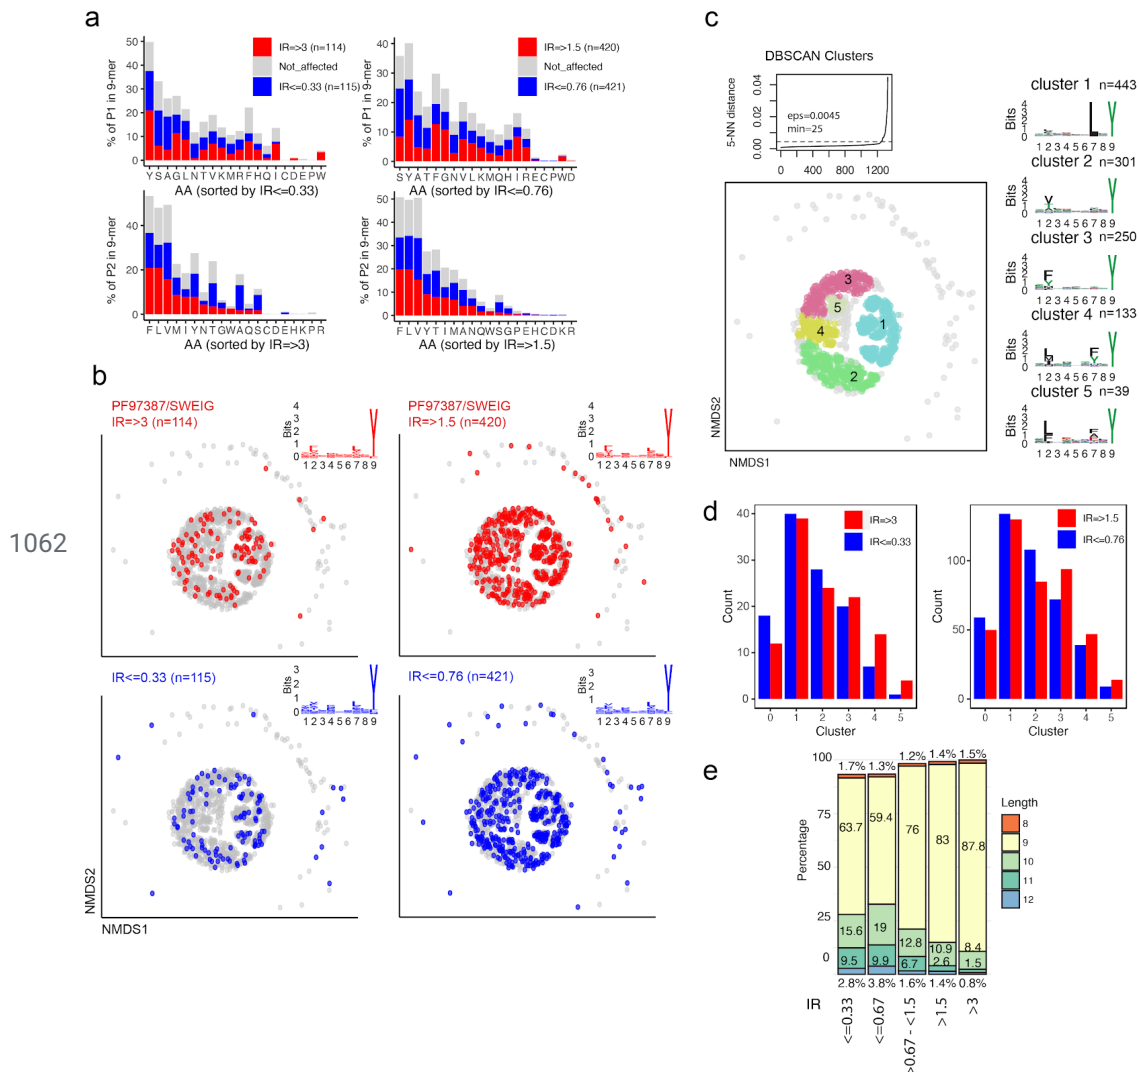

1063 **Supplemental Figure S5. Non-metric multidimensional scaling of the 1329 shared 9-mers**  
 1064 **eluted from the HLA-A29-positive cell lines PF97387 (ERAP1 high expression/activity) and**  
 1065 **SWEIG (ERAP1 low expression/activity).** The 1329 9-mers were filtered (removed peptides with  
 1066 value 0 in any of the 3 replicates from PF97387 or SWEIG) from a total of 5584 (3828 9-mers)  
 1067 peptides from *Alvarez-Navarro et al., 2015*. In this study, the normalized intensity ratio  
 1068 (PF97387/SWEIG) of each peptide in the two cell lines was used to infer the relative abundance of  
 1069 each peptide, which we adapted to assign peptides as ERAP2-dependent ( $IR \geq 1.5$  or  $IR \geq 3$ ) or  
 1070 ERAP2-sensitive ( $IR \leq 0.76$  or  $IR \leq 0.33$ ). We used  $IR \leq 0.76$  (instead of 0.67) compared to  $IR \geq 1.5$  so  
 1071 the peptide datasets would be of equal size. **a**) Comparison of amino acid proportion at P1 and P2 of  
 1072 9-mers (in percentage for each group of peptides) between peptides that decrease in abundance (in  
 1073 blue) in the presence of ERAP1 or that increase in abundance (in red), compared to peptides not  
 1074 affected by ERAP1 cells (in grey). All comparisons were not significant;  $P_{adj} > 0.05$ . **b**) Non-metric  
 1075 multidimensional scaling of the 1329 9-mers **c**) Five clusters were estimated (eps parameter for  
 1076 DBSCAN, using  $k=5$ , based on Figure 3C) using the elbow method. The sequence logos for each  
 1077 cluster are indicated on the right. **d**) Comparison of the number of ERAP1-dependent ( $IR \geq 1.5$  or  $IR \geq$   
 1078  $3$ ) and ERAP1-sensitive peptides ( $IR \leq 0.76$  or  $IR \leq 0.33$ ) in each peptide cluster identified in **b**.  $P_{adj} =$   
 1079 bonferroni corrected ( $n = \text{clusters}$ )  $\chi^2$  tests. The difference between the count of sensitive and  
 1080 dependent peptides in each cluster was not significant or  $P_{adj} > 0.05$ . **e**) The percentage of 9-mers and  
 1081 10-mers in peptide sets using different cut-offs for the intensity ratio (IR). This analysis confirms the  
 1082 length effects seen for ERAP1 as reported by *Alvarez-Navarro et al., 2015* in these cell lines (which  
 1083 are ERAP2-deficient).



1084  
1085

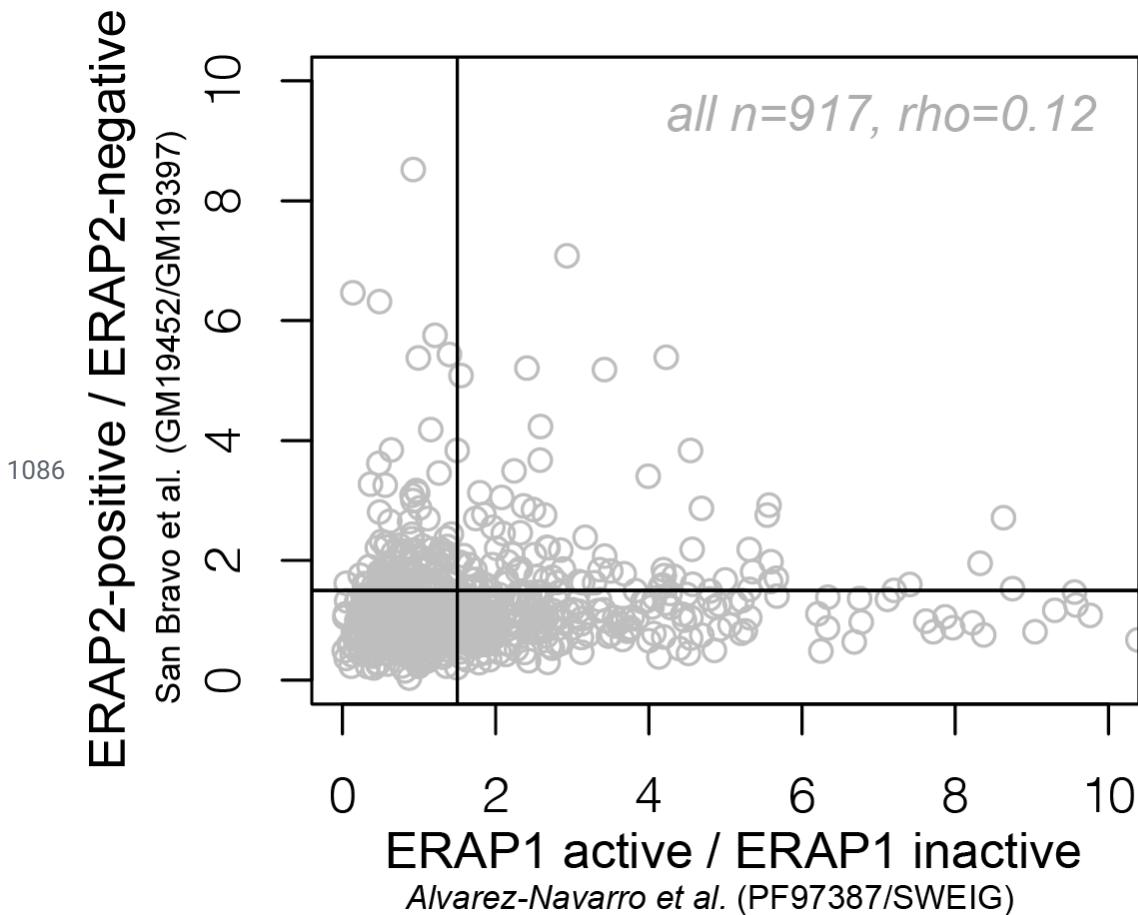

1087

1088 **Supplemental Figure S6. Correlation of the effects of ERAP1 and ERAP2 on the HLA-A29**  
1089 **peptidome.** We used the 974 HLA-A29-presented peptides detected in both (overlapping sequences)  
1090 datasets from *Sanz-Bravo et al., 2018* (ERAP2,  $n=1140$ ) and *Alvarez-Navarro et al., 2015* (ERAP1,  
1091  $n=5584$ ) of which 917 showed normalized intensity values  $>0$ . In these studies, the normalized  
1092 intensity ratio of each peptide in two cell lines was used to infer the relative abundance of each  
1093 peptide. We plotted the normalized intensity ratio for each peptide as reported in each study. The  
1094 spearman's correlation coefficient ( $\rho$ ) is shown for all 947 peptides in grey. The black lines indicate  
1095 the threshold of  $IR > 1.5$  used in each of the studies. This analysis suggests very low correlation  
1096 between the effects of ERAP1 and ERAP2 on the same peptides presented by HLA-A29.

1097

1098

1099

1100

1101

1102

1103

1104

1105

1106

1107

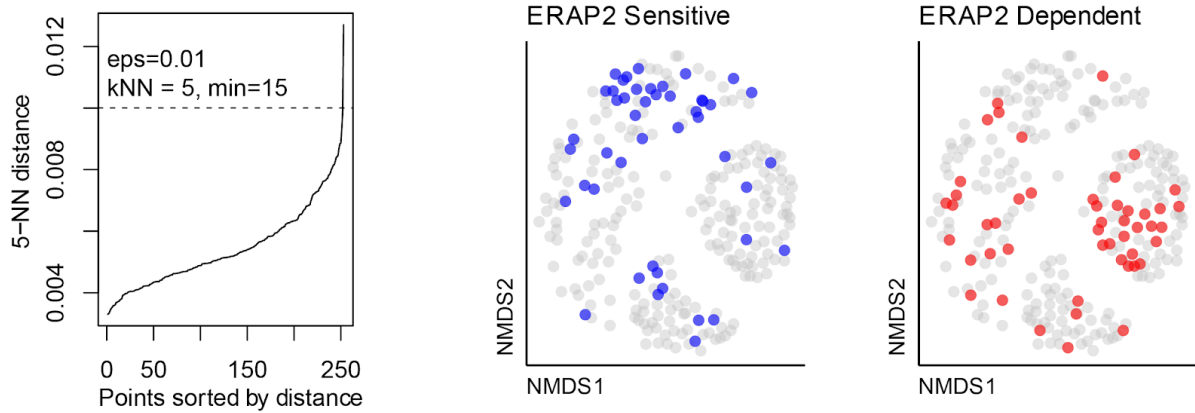

1108

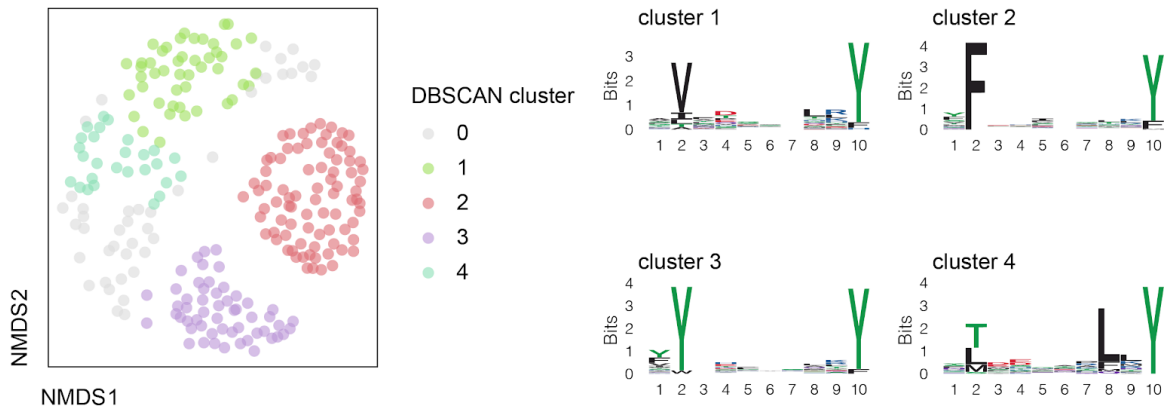

1109

1110 **Supplemental Figure S7.** Non-metric multidimensional scaling plot of 235 10-mers eluted from  
 1111 HLA-A29:02. Differentially expressed peptides are indicated in blue (ERAP2 sensitive that decrease in  
 1112 abundance in the presence of ERAP2) and red (ERAP2-dependent peptides that increase in  
 1113 abundance in the presence of ERAP2). A total of four clusters were identified and the sequence logos  
 1114 for each cluster are indicated. Cluster 0 indicates the unassigned peptides.

1115

1116

1117

1118

1119

1120

1121

1122

1123

1124

1125

1126

1127

1128

1129

1130

1131

1132

1133

1134

1135  
1136

1137

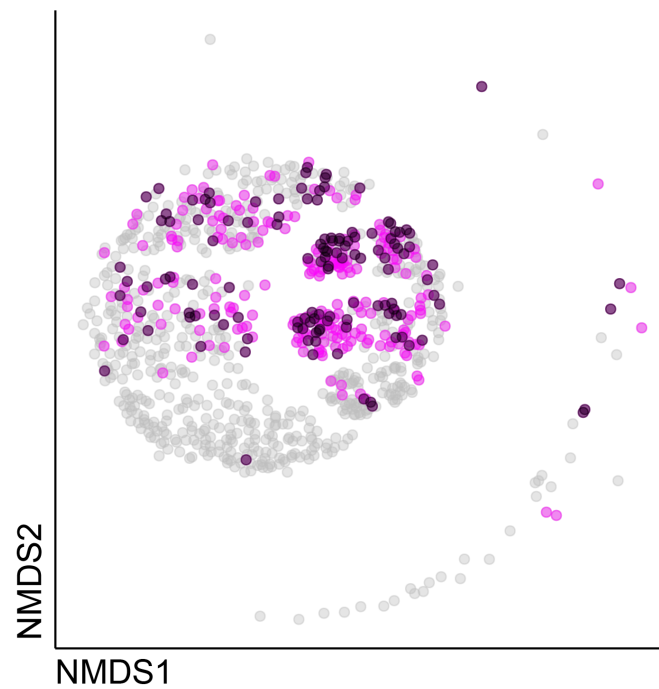

1138 **Supplemental Figure S8.** Non-metric multidimensional scaling plot of 948 9-mers eluted from  
1139 HLA-A29:02 in this study. Peptides with a binding score  $MSi > 0.6$  for HLA-A03:01 from *HLAthena*  
1140 (<https://HLAthena.tools>) are highlighted in magenta. Peptides with a binding score  $MSi > 0.6$  for  
1141 HLA-A03:01 that are differentially expressed (moderate  $q < 0.01$ ) are indicated in black.

1142  
1143  
1144  
1145  
1146  
1147  
1148  
1149  
1150  
1151  
1152  
1153  
1154  
1155  
1156  
1157  
1158  
1159  
1160  
1161  
1162  
1163  
1164  
1165

1166

1167

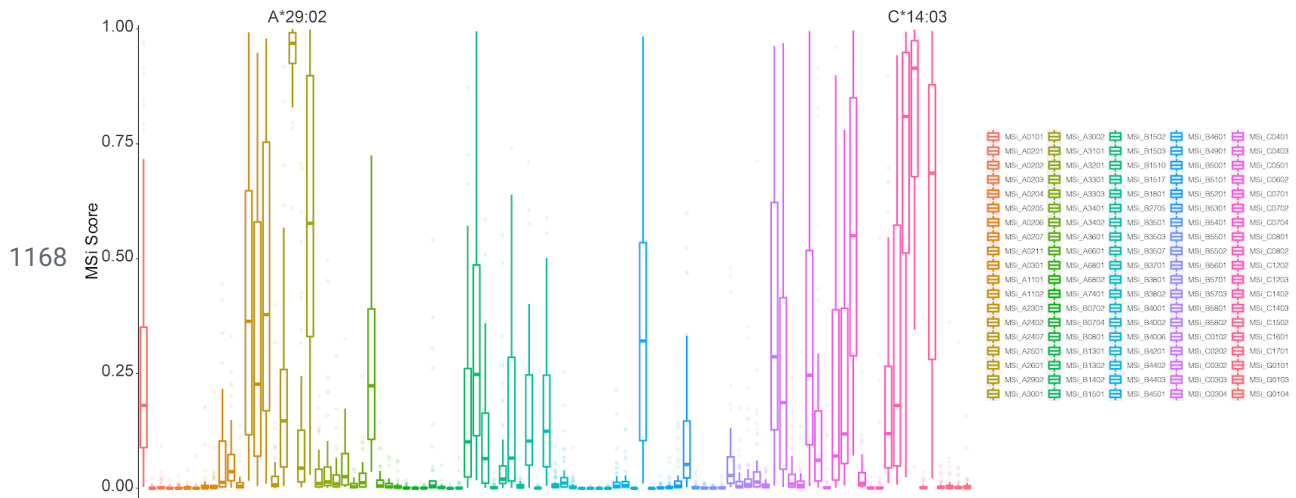

1168

1169

1170 **Supplemental Figure S9.** Predicted binding scores (in MSi) for the 53 ERAP2-dependent peptides in  
1171 cluster 2 across 95 HLA alleles (selection of alleles tested based on Sarkizova *et al.*, 2020).

1172

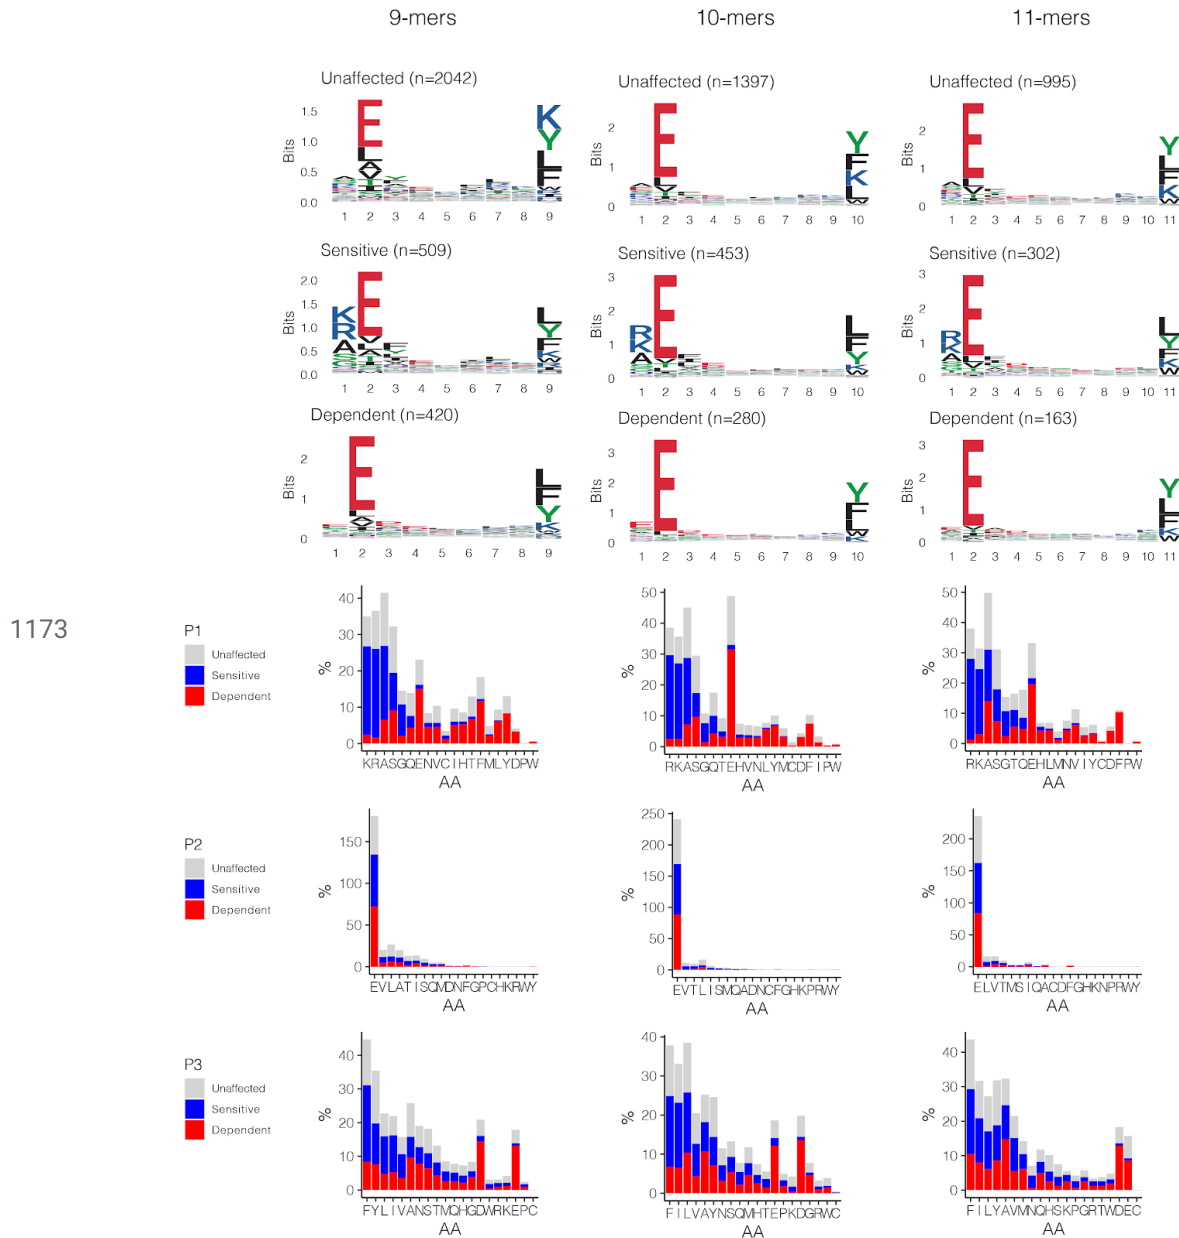

1174 **Supplemental Figure S10. The effect of ERAP2 on the HLA class I peptide.** Sequence motifs  
 1175 depict specific amino acid preferences for 9, 10, and 11 mers were generated from a non-redundant  
 1176 list of peptides from HLA class I (W6/32). Comparison of amino acid proportion at P1, P2, and P3 of  
 1177 (in percentage for each group of peptides) between peptides that decrease in abundance ('sensitive'),  
 1178 peptides that increase in abundance ('dependent' peptides) compared to peptides not affected in  
 1179 ERAP2-WT cells (in grey).

1180

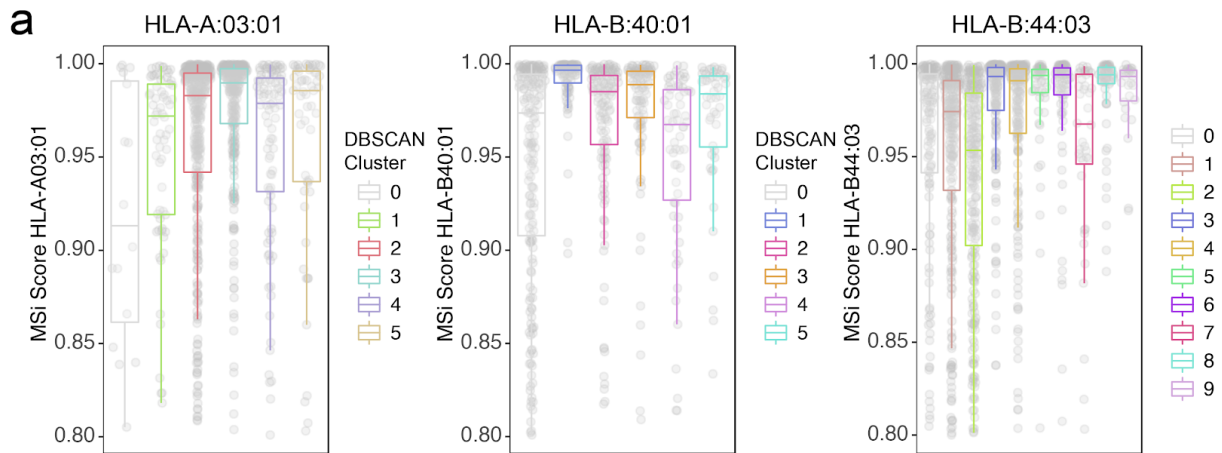

1181

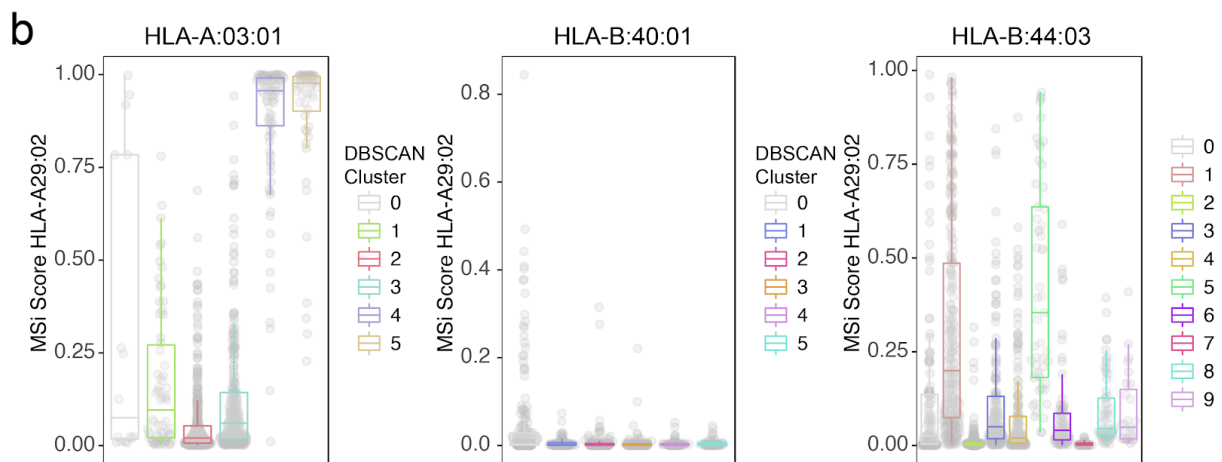

1182 **Supplemental Figure S11.** Peptide bindings scores from *HLAthena* (HLAthena.tools) for peptide  
1183 clusters from Figure 4. a) The binding score (MSi) for 9-mers with a MSi>0.8 used for the non-metric  
1184 multidimensional scaling of *HLA-A\*03:01*, *HLA-B\*40:01*, and *HLA-B\*44:03*. The binding score ranges  
1185 from 0 (low) to 1 (high). Clusters identified by DBSCAN are indicated and color-coded. b) The binding  
1186 score for *HLA-A\*29:02* (MSi) for the same 9-mers and clusters as shown in a.

1187

1188

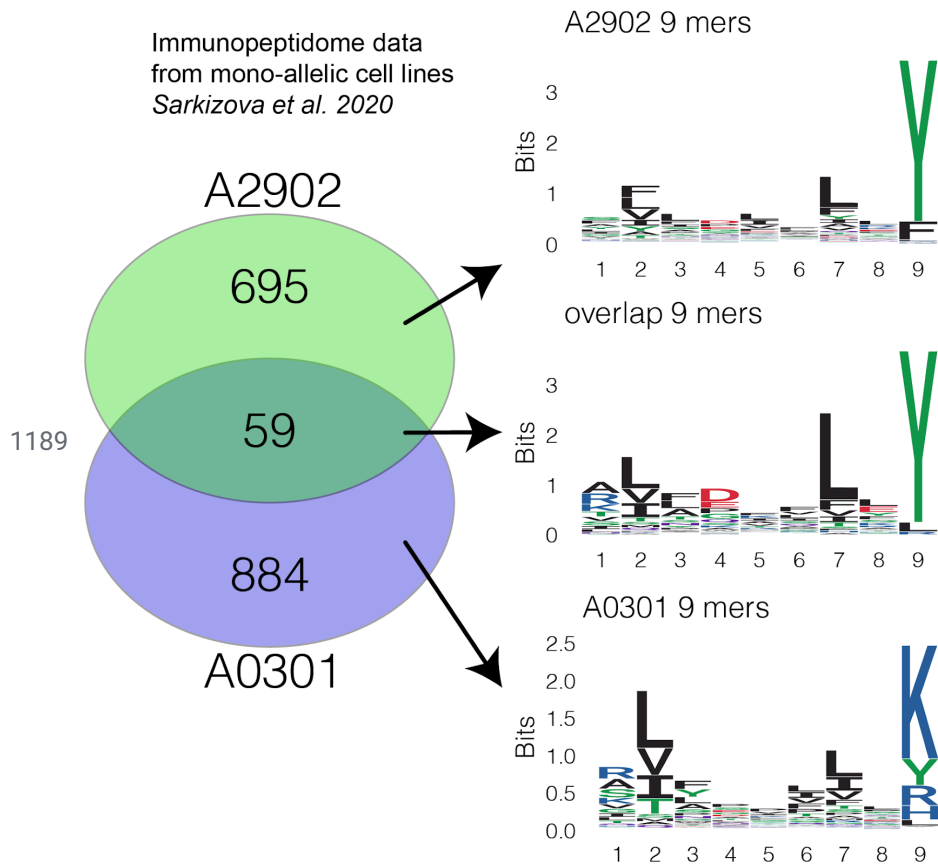

1190

1191 **Supplemental Figure S12.** Venn diagram of 9-mers presented by monoallelic cell lines expressing  
1192 only HLA-A29:02 or only HLA-A03:01 from *Sarkizova et al., 2020*. A total of 59 9-mers were detected  
1193 in both datasets. The sequence logos for peptides uniquely observed in HLA-A29, overlapping  
1194 peptides found in both monoallelic datasets, and peptides uniquely observed in HLA-A03 are  
1195 indicated on the right.

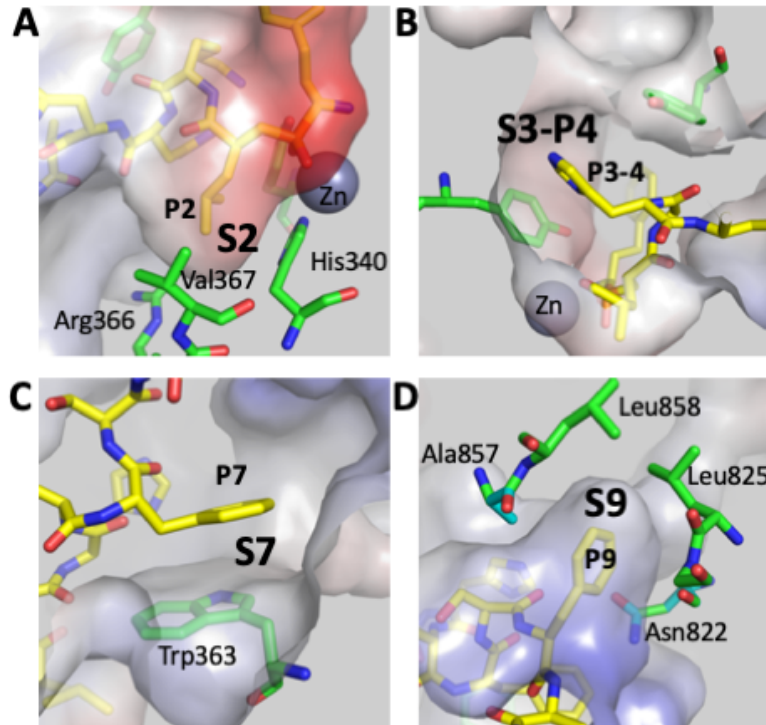

1196

1197 **Supplemental Figure S13. Putative specificity pockets of ERAP2 that help explain observed**  
1198 **sequence motifs.** ERAP2 (from PDB code 5AB0) is shown in surface representation colored by  
1199 electrostatic potential (red=negative, white=neutral, blue=positive). Peptide analogue DG025 that  
1200 was crystallized bound onto ERAP2 is shown in yellow sticks (carbon=yellow, oxygen=red,  
1201 nitrogen=blue). Nearby ERAP2 residues that help form indicated specificity pockets are shown in  
1202 green sticks. Specificity pockets are indicated as a) S2, b) S3-4, c) S7 and d) S9. Peptide residue  
1203 side-chains that are accommodated in the pockets are indicated as P2, P3-4, P7 and P $\Omega$ .

1204

1205

1206

1207

1208

1209

1210

1211

1212

1213

1214

1215

1216

1217

1218

1219

1220

1221

1222



## 1223 **References Supplemental Info**

1224

1225 Alvarez-Navarro C, Martín-Esteban A, Barnea E, Admon A, López de Castro JA. Endoplasmic  
1226 Reticulum Aminopeptidase 1 (ERAP1) Polymorphism Relevant to Inflammatory Disease Shapes the  
1227 Peptidome of the Birdshot Chorioretinopathy- Associated HLA-A\*29:02 Antigen. *Mol Cell Proteomics*.  
1228 2015 Jul;14(7):1770-80.

1229

1230 Brosch M, Yu L, Hubbard T, Choudhary J. Accurate and sensitive peptide identification with  
1231 Mascot Percolator. *J Proteome Res*. 2009 Jun;8(6):3176-81.

1232

1233 Kammers K, Cole RN, Tiengwe C, Ruczinski I. Detecting Significant Changes in Protein  
1234 Abundance. *EuPA Open Proteom*. 2015 Jun;7:11-19.

1235

1236 Sanz-Bravo A, Martín-Esteban A, Kuiper JJW, García-Peydró M, Barnea E, Admon A, López de  
1237 Castro JA. Allele-specific Alterations in the Peptidome Underlie the Joint Association of  
1238 HLA-A\*29:02 and Endoplasmic Reticulum Aminopeptidase 2 (ERAP2) with Birdshot  
1239 Chorioretinopathy. *Mol Cell Proteomics*. 2018 Aug;17(8):1564-1577.

1240

1241 Sarkizova S, Klaeger S, Le PM, Li LW, Oliveira G, Keshishian H, Hartigan CR, Zhang W, Braun  
1242 DA, Ligon KL, Bachireddy P, Zervantonakis IK, Rosenbluth JM, Ouspenskaia T, Law T, Justesen  
1243 S, Stevens J, Lane WJ, Eisenhaure T, Lan Zhang G, Clauser KR, Hacohen N, Carr SA, Wu CJ,  
1244 Keskin DB. A large peptidome dataset improves HLA class I epitope prediction across most of  
1245 the human population. *Nat Biotechnol*. 2020 Feb;38(2):199-209.

1246

1247

1248

1249

1250

1251
